# Supplementary material for: Fine interaction profiling of VemP and mechanisms responsible for its translocation-coupled arrest-cancelation
Source: eLife journal article supplement (doi:10.7554/elife.62623), 2020-12-15
Supplement: fig2-data1 [file Figure 2-quantified data.xlsx]

## Sheet: Fig2B W124
Figure 2B : xuL22 (W124pBPA)		201101 (3d)
XL products
Band Intensity	Chase(min)	1st	2nd	3rd
	0.5	297	174	223
	1	121	74.9	68.7
	2	78.1	0	34.5
Relative value	Chase(min)	1st	2nd	3rd
	0.5	1	1	1
	1	0.407	0.43	0.308
	2	0.263	0	0.155
VemP
Band Intensities		1st			2nd			3rd
	Chase(min)	FL-m	AP-un	AP-pro	FL-m	AP-un	AP-pro	FL-m	AP-un	AP-pro
	0.5	2336	1131	2189	2305	869	1741	1684	1036	2009
	1	3499	568	1699	3097	440	1363	2968	495	1412
	2	3874	255	1135	3439	238	878	3157	232	937
Mol (correction		1st			2nd			3rd
of Met content)	Chase(min)	FL-m	AP-un	AP-pro	FL-m	AP-un	AP-pro	FL-m	AP-un	AP-pro
FL-m : 2 Met	0.5	1168	226	1095	1153	174	871	842	207	1005
AP-un : 5 Met	1	1750	114	850	1549	88	682	1484	99	706
AP-pro : 2 Met	2	1937	51	568	1720	48	439	1579	46	469
Mol		1st		2nd		3rd
	Chase(min)	VemP FL	VemP AP	VemP FL	VemP AP	VemP FL	VemP AP
	0.5	1168	1321	1153	1045	842	1212
	1	1750	964	1549	770	1484	805
	2	1937	619	1720	487	1579	515
Relative value		1st		2nd		3rd
	Chase(min)	VemP FL	VemP AP	VemP FL	VemP AP	VemP FL	VemP AP
	0.5	1	1	1	1	1	1
	1	1.5	0.73	1.34	0.737	1.76	0.664
	2	1.66	0.469	1.49	0.466	1.88	0.425
		Average					SD
	Chase(min)	VemP FL	VemP AP	XL product		Chase(min)	VemP FL	VemP AP	XL product
	0.5	1	1	1		0.5
	1	1.53	0.71	0.382		1	0.212	0.0403	0.0648
	2	1.68	0.453	0.139		2	0.1955	0.0246	0.1322

## Sheet: Fig2B A15
Figure 2B : xFfh (A15pBPA)		201023 (22hr) VemP
		201030 (5d) Ni
XL products						SlyD
Band Intensity	Chase(min)	1st	2nd	3rd		Band Intensity	Chase(min)	1st	2nd	3rd
	0.5	222	172	187			0.5	796	1542	1746
	1	82.4	88.4	87			1	955	1832	1608
	2	30.5	44.1	33.1			2	1369	1720	1944
Relative value	Chase(min)	1st	2nd	3rd
of XL/SlyD	0.5	1	1	1
	1	0.371	0.514	0.465
	2	0.137	0.256	0.177
VemP
Band Intensities		1st			2nd			3rd
	Chase(min)	FL-m	AP-un	AP-pro	FL-m	AP-un	AP-pro	FL-m	AP-un	AP-pro
	0.5	776	952	1775	952	1563	2255	922	1680	2409
	1	1003	674	1181	1108	1126	1572	1224	1244	1842
	2	1219	451	698	1544	894	1073	1473	858	1145
Mol (correction		1st			2nd			3rd
of Met content)	Chase(min)	FL-m	AP-un	AP-pro	FL-m	AP-un	AP-pro	FL-m	AP-un	AP-pro
FL-m : 2 Met	0.5	388	190	888	476	313	1128	461	336	1205
AP-un : 5 Met	1	502	135	591	554	225	786	612	248	921
AP-pro : 2 Met	2	610	90	349	772	179	537	737	172	573
Mol		1st		2nd		3rd
	Chase(min)	VemP FL	VemP AP	VemP FL	VemP AP	VemP FL	VemP AP
	0.5	388	1078	476	1441	461	1541
	1	502	726	554	1011	612	1169
	2	610	439	772	716	737	745
Relative value		1st		2nd		3rd
	Chase(min)	VemP FL	VemP AP	VemP FL	VemP AP	VemP FL	VemP AP
	0.5	1	1	1	1	1	1
	1	1.29	0.673	1.16	0.702	1.33	0.759
	2	1.57	0.497	1.62	0.497	1.6	0.483
		Average					SD
	Chase(min)	VemP FL	VemP AP	XL product		Chase(min)	VemP FL	VemP AP	XL product
	0.5	1	1	1		0.5
	1	1.26	0.711	0.45		1	0.0889	0.0438	0.727
	2	1.6	0.492	0.19		2	0.0252	0.0081	0.0606

## Sheet: Fig2B F81
Figure 2B : xSecG (F81pBPA)		201102 (3d)
XL products
Band Intensity	Chase(min)	1st	2nd	3rd
	0.5	354	362	351
	1	248	332	275
	2	155	154	91
Relative value	Chase(min)	1st	2nd	3rd
	0.5	1	1	1
	1	0.707	0.797	0.812
	2	0.473	0.461	0.218
VemP
Band Intensities		1st			2nd			3rd
	Chase(min)	FL-m	AP-un	AP-pro	FL-m	AP-un	AP-pro	FL-m	AP-un	AP-pro
	0.5	918	1241	2156	1337	1393	2143	1334	1498	2556
	1	1173	724	1617	1980	815	1867	1806	885	2136
	2	1604	355	1028	2328	375	993	2290	411	1187
Mol (correction		1st			2nd			3rd
of Met content)	Chase(min)	FL-m	AP-un	AP-pro	FL-m	AP-un	AP-pro	FL-m	AP-un	AP-pro
FL-m : 2 Met	0.5	459	248	1078	669	279	1072	667	300	1278
AP-un : 5 Met	1	587	145	809	990	163	934	903	177	1068
AP-pro : 2 Met	2	802	71	514	1164	75	497	1145	82	594
Mol		1st		2nd		3rd
	Chase(min)	VemP FL	VemP AP	VemP FL	VemP AP	VemP FL	VemP AP
	0.5	459	1326	669	1351	667	1578
	1	587	954	990	1097	903	1245
	2	802	585	1164	572	1145	676
Relative value		1st		2nd		3rd
	Chase(min)	VemP FL	VemP AP	VemP FL	VemP AP	VemP FL	VemP AP
	0.5	1	1	1	1	1	1
	1	1.28	0.719	1.48	0.812	1.35	0.789
	2	1.75	0.441	1.74	0.423	1.72	0.428
		Average					SD
	Chase(min)	VemP FL	VemP AP	XL product		Chase(min)	VemP FL	VemP AP	XL product
	0.5	1	1	1		0.5
	1	1.37	0.773	0.772		1	0.1015	0.0484	0.0568
	2	1.74	0.431	0.384		2	0.0153	0.0093	0.1439

## Sheet: Fig2B T83
Figure 2-supple 1D : xSecG T83pBPA)			201104 (3d) VemP
XL products		wide
Band Intensity	Chase(min)	1st	2nd	3rd
	0.5	268	328	342
	1	183	223	165
	2	85.3	112	38.1
Relative value	Chase(min)	1st	2nd	3rd
	0.5	1	1	1
	1	0.683	0.68	0.482
	2	0.318	0.341	0.111
VemP
Band Intensities		1st			2nd			3rd
	Chase(min)	FL-m	AP-un	AP-pro	FL-m	AP-un	AP-pro	FL-m	AP-un	AP-pro
	0.5	1211	876	1634	1375	1038	1845	1662	1388	2318
	1	1850	479	1226	1996	627	1456	2364	792	1790
	2	2404	242	683	2110	317	758	2883	372	934
Mol (correction		1st			2nd			3rd
of Met content)	Chase(min)	FL-m	AP-un	AP-pro	FL-m	AP-un	AP-pro	FL-m	AP-un	AP-pro
FL-m : 2 Met	0.5	606	175	817	688	208	923	831	278	1159
AP-un : 5 Met	1	925	96	613	998	125	728	1182	158	895
AP-pro : 2 Met	2	1202	48	342	1055	63	379	1442	74	467
Mol		1st		2nd		3rd
	Chase(min)	VemP FL	VemP AP	VemP FL	VemP AP	VemP FL	VemP AP
	0.5	606	992	688	1131	831	1437
	1	925	709	998	853	1182	1053
	2	1202	390	1055	442	1442	541
Relative value		1st		2nd		3rd
	Chase(min)	VemP FL	VemP AP	VemP FL	VemP AP	VemP FL	VemP AP
	0.5	1	1	1	1	1	1
	1	1.53	0.715	1.45	0.754	1.42	0.733
	2	1.98	0.393	1.53	0.391	1.74	0.376
		Average					SD
	Chase(min)	VemP FL	VemP AP	XL product		Chase(min)	VemP FL	VemP AP	XL product
	0.5	1	1	1		0.5
	1	1.47	0.734	0.615		1	0.0569	0.0195	0.1152
	2	1.75	0.387	0.257		2	0.2252	0.0093	0.1267

## Sheet: Fig2B F56
Figure 2-supple 1D : xPpiD F56pBPA)			201103 (3d) VemP
XL products		wide
Band Intensity	Chase(min)	1st	2nd	3rd
	0.5	196	224	255
	1	141	111	180
	2	39	40.3	62.2
Relative value	Chase(min)	1st	2nd	3rd
	0.5	1	1	1
	1	0.719	0.496	0.706
	2	0.199	0.18	0.244
VemP
Band Intensities		1st			2nd			3rd
	Chase(min)	FL-m	AP-un	AP-pro	FL-m	AP-un	AP-pro	FL-m	AP-un	AP-pro
	0.5	1136	777	1600	1716	983	1514	1642	1088	1706
	1	1615	460	1207	2186	495	1034	2156	553	1215
	2	1972	223	586	2555	185	475	2604	270	686
Mol (correction		1st			2nd			3rd
of Met content)	Chase(min)	FL-m	AP-un	AP-pro	FL-m	AP-un	AP-pro	FL-m	AP-un	AP-pro
FL-m : 2 Met	0.5	568	155	800	858	197	757	821	218	853
AP-un : 5 Met	1	808	92	604	1093	99	517	1078	111	608
AP-pro : 2 Met	2	986	45	293	1278	37	237.5	1302	54	343
Mol		1st		2nd		3rd
	Chase(min)	VemP FL	VemP AP	VemP FL	VemP AP	VemP FL	VemP AP
	0.5	568	955	858	954	821	1071
	1	808	696	1093	616	1078	719
	2	986	338	1278	275	1302	397
Relative value		1st		2nd		3rd
	Chase(min)	VemP FL	VemP AP	VemP FL	VemP AP	VemP FL	VemP AP
	0.5	1	1	1	1	1	1
	1	1.4	0.729	1.32	0.646	1.29	0.671
	2	1.72	0.354	1.53	0.288	1.51	0.371
		Average					SD
	Chase(min)	VemP FL	VemP AP	XL product		Chase(min)	VemP FL	VemP AP	XL product
	0.5	1	1	1		0.5
	1	1.34	0.682	0.64		1	0.0569	0.0426	0.1252
	2	1.59	0.338	0.208		2	0.1159	0.0438	0.0329

## Sheet: Fig2B Y36
Figure 2B : xPpiD (Y36pBPA)		201029 (3days)
XL products		wide-range
Band Intensity	Chase(min)	1st	2nd	3rd
	0.5	206	276	270
	1	243	298	274
	2	170	189	196
Relative value	Chase(min)	1st	2nd	3rd
	0.5	1	1	1
	1	1.18	1.08	1.01
	2	0.823	0.685	0.726
VemP
Band Intensities		1st			2nd			3rd
	Chase(min)	FL-m	AP-un	AP-pro	FL-m	AP-un	AP-pro	FL-m	AP-un	AP-pro
	0.5	1033	832	1454	1639	1425	2441	1650	1358	2456
	1	1529	527	1129	2276	893	1851	2110	753	1835
	2	2090	326	666	2588	386	883	2961	456	956
Mol (correction		1st			2nd			3rd
of Met content)	Chase(min)	FL-m	AP-un	AP-pro	FL-m	AP-un	AP-pro	FL-m	AP-un	AP-pro
FL-m : 2 Met	0.5	517	166	727	820	285	1221	825	272	1228
AP-un : 5 Met	1	765	105	565	1138	179	926	1055	151	918
AP-pro : 2 Met	2	1045	65	333	1294	77	442	1481	91	478
Mol		1st		2nd		3rd
	Chase(min)	VemP FL	VemP AP	VemP FL	VemP AP	VemP FL	VemP AP
	0.5	517	893	820	1506	825	1500
	1	765	670	1138	1105	1055	1069
	2	1045	398	1294	519	1481	569
Relative value		1st		2nd		3rd
	Chase(min)	VemP FL	VemP AP	VemP FL	VemP AP	VemP FL	VemP AP
	0.5	1	1	1	1	1	1
	1	1.48	0.75	1.39	0.733	1.28	0.713
	2	2.02	0.446	1.58	0.345	1.8	0.379
		Average					SD
	Chase(min)	VemP FL	VemP AP	XL product		Chase(min)	VemP FL	VemP AP	XL product
	0.5	1	1	1		0.5
	1	1.38	0.732	1.09		1	0.1002	0.0185	0.0854
	2	1.8	0.39	0.745		2	0.22	0.0514	0.0709

## Sheet: Fig2B Summary
xuL22	Average
W124pBPA		0.5	1	2
	VemP FL	1	1.53	1.68
	VemP AP	1	0.71	0.453
	XL product	1	0.382	0.139
	Standard deviation
		0.5	1	2
	VemP FL		0.212	0.1955
	VemP AP		0.0403	0.0246
	XL product		0.0648	0.1322
xFfh	Average
A15pBPA		0.5	1	2
	VemP FL	1	1.26	1.6
	VemP AP	1	0.711	0.492
	XL product	1	0.45	0.19
	Standard deviation
		0.5	1	2
	VemP FL		0.0889	0.0252
	VemP AP		0.0438	0.0081
	XL product		0.0727	0.0606
xSecG	Average											xSecG	Average
F81pBPA		0.5	1	2								T83pBPA		0.5	1	2
	VemP FL	1	1.37	1.74									VemP FL	1	1.47	1.75
	VemP AP	1	0.773	0.431									VemP AP	1	0.734	0.387
	XL product	1	0.772	0.384									XL product	1	0.615	0.257
	Standard deviation												Standard deviation
		0.5	1	2										0.5	1	2
	VemP FL		0.1015	0.0153									VemP FL		0.0569	0.2252
	VemP AP		0.0484	0.093									VemP AP		0.0195	0.0093
	XL product		0.0568	0.1439									XL product		0.1152	0.1267
xPpiD	Average											xPpiD	F56 average
Y36pBPA		0.5	1	2								F56pBPA		0.5	1	2
	VemP FL	1	1.38	1.8									VemP FL	1	1.34	1.59
	VemP AP	1	0.732	0.39									VemP AP	1	0.682	0.338
	XL product	1	1.09	0.745									XL product	1	0.64	0.208
	Standard deviation												F56 std
		0.5	1	2										0.5	1	2
	VemP FL		0.1002	0.22									VemP FL		0.0569	0.1159
	VemP AP		0.0185	0.0514									VemP AP		0.0426	0.0438
	XL product		0.0854	0.0745									XL product		0.1252	0.0329

## Sheet: Fig2C
Figure 2C : Cross-linking efficiency at 1 min after chase
		Relative value of XL product					Average of Relative VemP AP
		1st	2nd	3rd
	xL22(W124)	0.407	0.43	0.308			0.71
	xFfh(A15)	0.371	0.514	0.465			0.711
	xSecG(F81)	0.707	0.797	0.812			0.773
	xSecG(T83)	0.683	0.68	0.482			0.734
	xPpiD(F56)	0.719	0.496	0.706			0.682
	xPpiD(Y36)	1.18	1.08	1.01			0.732
		XL product/VemP AP
		1st	2nd	3rd
	xL22(W124)	0.573	0.606	0.434			xL22(W124)	Average	S.D.
	xFfh(A15)	0.522	0.723	0.654			xFfh(A15)	0.538	0.0913
	xSecG(F81)	0.915	1.03	1.05			xSecG(F81)	0.633	0.1021
	xSecG(T83)	0.931	0.926	0.657			xSecG(T83)	0.998	0.0729
	xPpiD(F56)	1.05	0.727	1.04			xPpiD(F56)	0.838	0.1568
	xPpiD(Y36)	1.61	1.48	1.38			xPpiD(Y36)	0.939	0.1837
								1.49	0.1153
