# Supplementary material for: Fine interaction profiling of VemP and mechanisms responsible for its translocation-coupled arrest-cancelation
Source: eLife journal article supplement (doi:10.7554/elife.62623), 2020-12-15
Supplement: fig2-figsupp1-data1 [file Figure 2-figure supplement 1-quantified data.xlsx]

## Sheet: Fig2-S1A WT
Figure 2-supple1B : Arrest efficiency of VemP derivatives
in WT strain
WT VemP												Arrested VemP (%) = (AP-un + AP-pro)/(FL-m +AP-un + AP-pro)x100
Band Intensities		1st			2nd			3rd					1st			2nd			3rd			4th
	Chase(min)	FL-m	AP-un	AP-pro	FL-m	AP-un	AP-pro	FL-m	AP-un	AP-pro		Chase(min)	0.5	1	2	0.5	1	2	0.5	1	2	0.5	1	2
	0.5	448	185	381	588	211	481	190	38.4	206		WT VemP	50.4	37.4	22.5	49.1	33.1	20.1	53.8	35.3	21.9
	1	519	110	265	780	129	334	252	19.2	130		Y36pBPA	56.7	44.9	24.6	54.8	37.9	22.5	56.9	40.8	26.5
	2	601	71.7	146	775	73.2	166	280	13.9	73		F56pBPA	50.4	35.6	22.5	49.5	31.2	19.5	54.9	37.8	26.1
Mol (correction		1st			2nd			3rd				F81pBPA	71.5	55.5	38.4	68	52.4	35.2	66.9	50.2	33.1
of Met content)	Chase(min)	FL-m	AP-un	AP-pro	FL-m	AP-un	AP-pro	FL-m	AP-un	AP-pro		T83pBPA	54.4	34.9	22.1	49.9	31.4	17.5	61.6	46.5	32.5
FL-m : 2 Met	0.5	224	37	191	294	42.2	241	95	7.7	103		W124pBPA	48.3	35	29	44.1	35	26.6	42.4	31.7	25.3	46.5	34.9	25.7
AP-un : 5 Met	1	260	22	133	390	25.8	167	126	3.8	65
AP-pro : 2 Met	2	301	14.3	73	388	14.6	83	140	2.8	36.5
												Arrested VemP (%)
Y36pBPA												Average
Band Intensities		1st			2nd			3rd				Chase(min)	0.5	1	2
	Chase(min)	FL-m	AP-un	AP-pro	FL-m	AP-un	AP-pro	FL-m	AP-un	AP-pro		WT VemP	51.1	35.3	21.5
	0.5	424	254	453	526	280	525	366	211	398		Y36pBPA	56.1	41.2	24.5
	1	506	144	353	676	147	354	455	110	269		F56pBPA	51.6	34.9	22.7
	2	641	94.5	172	752	91.4	182	555	80.4	168		F81pBPA	68.8	52.7	35.6
Mol (correction		1st			2nd			3rd				T83pBPA	55.3	37.6	24
of Met content)	Chase(min)	FL-m	AP-un	AP-pro	FL-m	AP-un	AP-pro	FL-m	AP-un	AP-pro		W124pBPA	45.3	34.2	26.7
FL-m : 2 Met	0.5	212	50.8	227	263	56	263	183	42.2	199
AP-un : 5 Met	1	253	28.8	177	338	29.4	177	228	22	135		S.D.
AP-pro : 2 Met	2	321	18.9	86	376	18.3	91	278	16.1	84		Chase(min)	0.5	1	2
												WT VemP	2.427	2.15	1.249
F56pBPA												Y36pBPA	1.159	3.517	2.001
Band Intensities		1st			2nd			3rd				F56pBPA	2.893	3.361	3.305
	Chase(min)	FL-m	AP-un	AP-pro	FL-m	AP-un	AP-pro	FL-m	AP-un	AP-pro		F81pBPA	2.402	2.663	2.669
	0.5	500	191	431	546	204	454	549	271	559		T83pBPA	5.902	7.904	7.685
	1	594	106	285	682	92.2	271	654	128	346		W124pBPA	2.601	1.634	1.658
	2	728	67	170	700	49.7	150	742	85	227
Mol (correction		1st			2nd			3rd
of Met content)	Chase(min)	FL-m	AP-un	AP-pro	FL-m	AP-un	AP-pro	FL-m	AP-un	AP-pro
FL-m : 2 Met	0.5	250	38.2	216	273	40.8	227	275	54.2	280
AP-un : 5 Met	1	297	21.2	143	341	18.4	136	327	25.6	173
AP-pro : 2 Met	2	364	13.4	85	350	9.9	75	371	17	114
F81pBPA
Band Intensities		1st			2nd			3rd
	Chase(min)	FL-m	AP-un	AP-pro	FL-m	AP-un	AP-pro	FL-m	AP-un	AP-pro
	0.5	353	366	739	315	247	573	247	193	424
	1	451	183	489	419	137	408	341	91	307
	2	538	115	289	478	75.3	230	388	39.7	176
Mol (correction		1st			2nd			3rd
of Met content)	Chase(min)	FL-m	AP-un	AP-pro	FL-m	AP-un	AP-pro	FL-m	AP-un	AP-pro
FL-m : 2 Met	0.5	177	73.2	370	158	49.4	287	124	38.6	212
AP-un : 5 Met	1	226	36.6	245	210	27.4	204	171	18.2	154
AP-pro : 2 Met	2	269	23	145	239	15.1	115	194	7.9	88
T83pBPA
Band Intensities		1st			2nd			3rd
	Chase(min)	FL-m	AP-un	AP-pro	FL-m	AP-un	AP-pro	FL-m	AP-un	AP-pro
	0.5	565	255	574	376	133	322	330	219	442
	1	784	127	370	550	64.4	225	403	124	302
	2	800	73.9	197	554	32.2	105	457	83.9	187
Mol (correction		1st			2nd			3rd
of Met content)	Chase(min)	FL-m	AP-un	AP-pro	FL-m	AP-un	AP-pro	FL-m	AP-un	AP-pro
FL-m : 2 Met	0.5	283	51	287	188	26.6	161	165	43.8	221
AP-un : 5 Met	1	392	25.4	185	275	12.9	113	202	24.8	151
AP-pro : 2 Met	2	400	14.8	98.5	277	6.4	52.5	229	16.8	93.5
W124pBPA
Band Intensities		1st			2nd			3rd			4th
	Chase(min)	FL-m	AP-un	AP-pro	FL-m	AP-un	AP-pro	FL-m	AP-un	AP-pro	FL-m	AP-un	AP-pro
	0.5	948	252	785	1140	254	796	979	211	636	1179	357	883
	1	1110	104	555	1190	101	600	1020	80.1	442	1408	204	671
	2	1030	66.1	393	1200	58.6	411	957	40.8	308	1366	82	439
Mol (correction		1st			2nd			3rd			4th
of Met content)	Chase(min)	FL-m	AP-un	AP-pro	FL-m	AP-un	AP-pro	FL-m	AP-un	AP-pro	FL-m	AP-un	AP-pro
FL-m : 2 Met	0.5	474	50.4	393	570	50.8	398	490	42.2	318	590	71.4	442
AP-un : 5 Met	1	555	20.8	278	595	20.2	300	510	16	221	704	40.8	336
AP-pro : 2 Met	2	515	13.2	197	600	11.7	206	479	8.2	154	683	16.4	220

## Sheet: Fig2-S1A ffh
Figure 2-supple1B : Arrest efficiency of VemP derivatives
in ffh-his10 strain
WT VemP												Arrested VemP (%) = (AP-un + AP-pro)/(FL-m +AP-un + AP-pro)x100
Band Intensities		1st			2nd			3rd					1st			2nd			3rd
	Chase(min)	FL-m	AP-un	AP-pro	FL-m	AP-un	AP-pro	FL-m	AP-un	AP-pro		Chase(min)	0.5	1	2	0.5	1	2	0.5	1	2
	0.5	251	122	294	303	203	424	355	238	525		WT VemP	57.6	40.9	27.5	62.4	42.7	30.3	63.6	47.9	30.7
	1	313	69	190	429	102	279	521	181	408		A15pBPA	67.2	55.3	36.5	69.9	58.8	38.2	72.1	58.6	41.3
	2	335	51	107	482	83	176	610	125	220
Mol (correction		1st			2nd			3rd				Arrested VemP (%)
of Met content)	Chase(min)	FL-m	AP-un	AP-pro	FL-m	AP-un	AP-pro	FL-m	AP-un	AP-pro		Average
FL-m : 2 Met	0.5	126	24.4	147	152	40.6	212	178	47.6	263		Chase(min)	0.5	1	2
AP-un : 5 Met	1	157	13.8	95	215	20.4	140	261	36.2	204		WT VemP	61.2	43.8	29.5
AP-pro : 2 Met	2	168	10.2	53.5	241	16.6	88	305	25	110		A15pBPA	69.7	57.6	38.7
A15pBPA												S.D.
Band Intensities		1st			2nd			3rd				Chase(min)	0.5	1	2
	Chase(min)	FL-m	AP-un	AP-pro	FL-m	AP-un	AP-pro	FL-m	AP-un	AP-pro		WT VemP	3.175	3.635	1.744
	0.5	292	278	485	440	439	851	668	728	1435		A15pBPA	2.454	1.966	2.434
	1	300	167	303	533	358	620	841	528	978
	2	349	102	160	638	209	309	930	335	519
Mol (correction		1st			2nd			3rd
of Met content)	Chase(min)	FL-m	AP-un	AP-pro	FL-m	AP-un	AP-pro	FL-m	AP-un	AP-pro
FL-m : 2 Met	0.5	146	55.6	243	220	87.8	423	334	146	718
AP-un : 5 Met	1	150	33.4	152	267	71.6	310	421	106	489
AP-pro : 2 Met	2	175	20.4	80	319	41.8	155	465	67	260

## Sheet: Fig2-S1A Summary
Figure 2-S1B : Arrest efficiency of VemP derivatives
	Arrested VemP (%)
	in WT	Average
	Chase(min)	0.5	1	2
	WT	51.1	35.3	21.5
	Y36(xPpiD)	56.1	41.2	24.5
	F56(xPpiD)	51.6	34.9	22.7
	F81(xSecG)	68.8	52.7	35.6
	T83(xSecG)	55.3	37.6	24
	W124(xL22)	45.3	34.2	26.7
	in WT	S.D.
	Chase(min)	0.5	1	2
	WT	2.427	2.15	1.249
	Y36(xPpiD)	1.159	3.517	2.001
	F56(xPpiD)	2.893	3.361	3.305
	F81(xSecG)	2.402	2.663	2.669
	T83(xSecG)	5.902	7.904	7.685
	W124(xL22)	2.601	1.634	1.658
	in ffh-his10	Average
	Chase(min)	0.5	1	2
	WT	61.2	43.8	29.5
	A15(xFfh)	69.7	57.6	38.7
	in ffh-his10	S.D.
	Chase(min)	0.5	1	2
	WT	3.175	3.635	1.744
	A15(xFfh)	2.454	1.966	2.434
