# Supplementary material for: Fine interaction profiling of VemP and mechanisms responsible for its translocation-coupled arrest-cancelation
Source: eLife journal article supplement (doi:10.7554/elife.62623), 2020-12-15
Supplement: fig2-figsupp3-data1 [file Figure 2-figure supplement 3-quantified data.xlsx]

## Sheet: Fig 2-s3
Figure 4A : VemP pulse-chase in an E. coli ΔppiD strain										Met contents		FL-m	2	AP-un	5
														AP-pro	2
	Band Intensity									Mol (Correction of Met content)
	1st	secA+			secA51					1st	secA+			secA51
	Chase(min)	0.5	1	2	0.5	1	2			Chase(min)	0.5	1	2	0.5	1	2
	FL-p	135	94.9	79.4	371	447	502			FL-p	27	18.98	15.88	74.2	89.4	100.4
	FL-m	1721	1536	1174	433	416	634			FL-m	860.5	768	587	216.5	208	317
	AP-un	883	463	147	4980	2601	1791			AP-un	176.6	92.6	29.4	996	520.2	358.2
	AP-pro	844	305	65.9	927	533	487			AP-pro	422	152.5	32.95	463.5	266.5	243.5
										AP (%)	40.3	23.8	9.4	83.4	72.6	59
	2nd	secA+			secA51					2nd	secA+			secA51
	Chase(min)	0.5	1	2	0.5	1	2			Chase(min)	0.5	1	2	0.5	1	2
	FL-p	264	234	100	1610	2244	2245			FL-p	52.8	46.8	20	322	448.8	449
	FL-m	5520	4629	3691	1350	2111	2556			FL-m	2760	2314.5	1845.5	675	1055.5	1278
	AP-un	4602	1987	723	14040	11340	5764			AP-un	920.4	397.4	144.6	2808	2268	1152.8
	AP-pro	3368	897	177	2467	2159	1621			AP-pro	1684	448.5	88.5	1233.5	1079.5	810.5
										AP (%)	48.1	26.4	11.1	80.2	69	53.2
										AP (%) : Arrested VemP (%) = (AP-un + AP-pro)/(FL + AP-un + AP-pro) x 100
					81.8	70.8	56.1
					2.26274	2.54558	4.10122
	Arrested VemP (%)		Average	Chase	0.5	1	2
				secA+	44.2	25.1	10.3
				secA51	81.8	70.8	56.1
			S.D.	Chase	0.5	1	2
				secA+	5.515	1.839	1.202
				secA51	2.263	2.546	4.101
