# Supplementary material for: Fine interaction profiling of VemP and mechanisms responsible for its translocation-coupled arrest-cancelation
Source: eLife journal article supplement (doi:10.7554/elife.62623), 2020-12-15
Supplement: fig2-figsupp4-data1 [file Figure 2-figure supplement 4-quantified data.xlsx]

## Sheet: Fig2-s4
Figure 2-supple 1 : Effect of NaN3 treatment on VemP crosslinking
	Band intensity							Relative value
1st		L22	Ffh	SecG	SecY	PpiD			L22	Ffh	SecG	SecY	PpiD
	NaN3 -	78	42	93	227	107		NaN3 -	1	1	1	1	1
	NaN3 +	302	62	24	104	37		NaN3 +	3.87	1.48	0.26	0.46	0.35
2nd		L22	Ffh	SecG	SecY	PpiD			L22	Ffh	SecG	SecY	PpiD
	NaN3 -	93	36	105	194	108		NaN3 -	1	1	1	1	1
	NaN3 +	289	56	5	80	39		NaN3 +	3.11	1.56	0.05	0.41	0.36
3rd		L22	Ffh	SecG	SecY	PpiD			L22	Ffh	SecG	SecY	PpiD
	NaN3 -	92	53	116	198	77		NaN3 -	1	1	1	1	1
	NaN3 +	282	67	11	97	27		NaN3 +	3.07	1.26	0.09	0.49	0.35
								Average
									L22	Ffh	SecG	SecY	PpiD
								NaN3 -	1	1	1	1	1
								NaN3 +	3.35	1.43	0.13	0.45	0.35
								S.D.
									L22	Ffh	SecG	SecY	PpiD
								NaN3 -
								NaN3 +	0.451	0.155	0.112	0.04	0.006
