# Supplementary material for: Fine interaction profiling of VemP and mechanisms responsible for its translocation-coupled arrest-cancelation
Source: eLife journal article supplement (doi:10.7554/elife.62623), 2020-12-15
Supplement: fig3-data1 [file Figure 3-quantified data.xlsx]

## Sheet: Fig 3A
Figure 3A : VemP pulse-chase in E. coli Ffh-depletable strain										Met contents		FL-m	2	AP-un	5
														AP-pro	2
	Band Intensity									Mol (Correction of Met content)
	1st	Ara+			Ara-					1st	Ara+			Ara-
	Chase(min)	0.5	1	2	0.5	1	2			Chase(min)	0.5	1	2	0.5	1	2
	FL-m	176	271	226	78.3	112	161			FL-m	88	136	113	39.2	56	80.5
	AP-un	69.7	37.7	10.7	510	495	465			AP-un	13.9	7.5	2.1	102	99	93
	AP-pro	87.5	67.8	24.2	176	116	82.4			AP-pro	43.8	33.9	12.1	88	58	41.2
										AP (%)	39.6	23.3	11.2	82.9	73.7	62.5
	2nd	Ara+			Ara-					2nd	Ara+			Ara-
	Chase(min)	0.5	1	2	0.5	1	2			Chase(min)	0.5	1	2	0.5	1	2
	FL-m	150	140	207	71.8	97.7	181			FL-m	75	70	104	35.9	48.9	90.5
	AP-un	75.1	30.6	13.3	483	459	408			AP-un	15	6.1	2.7	96.6	91.8	81.6
	AP-pro	99.7	62.1	32.7	171	113	77			AP-pro	49.9	31.1	16.4	85.5	56.5	38.5
										AP (%)	46.4	34.7	15.5	83.5	75.2	57
	3rd	Ara+			Ara-					3rd	Ara+			Ara-
	Chase(min)	0.5	1	2	0.5	1	2			Chase(min)	0.5	1	2	0.5	1	2
	FL-m	91.3	113	153	53	76.2	93.3			FL-m	45.7	56.5	76.5	26.5	38.1	46.7
	AP-un	43.4	20.4	9.3	333	307	218			AP-un	8.7	4.1	1.9	66.6	61.4	43.6
	AP-pro	67.9	47.2	25.7	130	90.8	54.8			AP-pro	34	23.6	12.9	65	45.4	27.4
										AP (%)	48.3	32.9	16.2	83.2	73.7	60.3
	Arrested VemP (%)		Average	Chase	0.5	1	2
				Ara+	44.8	30.3	14.3			AP (%) : Arrested VemP (%) = (AP-un + AP-pro)/(FL + AP-un + AP-pro) x 100
				Ara-	83.2	74.2	59.9
			S.D.	Chase	0.5	1	2
				Ara+	4.574	6.129	2.707
				Ara-	0.3	0.866	2.768

## Sheet: Fig 3B
Figure 3C : V.SecD2 synthesisl in E. coli Ffh-depletable strain
Band intensity		1st				2nd				3rd
			vec	WT	WTNaN3		vec	WT	WTNaN3		vec	WT	WTNaN3
		Ara +	5	108	880	Ara +	13	153	1029	Ara +	6	133	995
		Ara -	2	1943	1411	Ara -	6	1014	901	Ara -	7	1574	888
Relative value		1st				2nd				3rd
			vec	WT	WTNaN3		vec	WT	WTNaN3		vec	WT	WTNaN3
		Ara +	0.003	0.056	0.453	Ffh +	Ara +	0.151	1.01	Ara +	0.004	0.085	0.632
		Ara -	0.001	1	0.726	Ffh -	Ara -	1	0.889	Ara -	0.004	1	0.564
		Average
			vec	WT	WTNaN3
		Ara +	0.0035	0.0973333	0.698333
		Ara -	0.0025	1	0.726333
		S.D.
			vec	WT	WTNaN3
		Ara +	0.000707107	0.0486861	0.284363
		Ara -	0.00212132		0.1625

## Sheet: Fig 3C
Figure 3C : V.SecD2 level in Vibrio Ffh-depletable strain
	Band Intensity of V.SecD2									Relative Value (WT Glu = 1)
	1st		WT	ΔDF1	ΔDF2	Ffh-dep				1st		WT	ΔDF1	ΔDF2	Ffh-dep
		Ara +	46	485	14	16					Ara +	0.09	0.95	0.03	0.03
		Ara -	44	510	18	241					Ara -	0.09	1	0.04	0.47
	2nd		WT	ΔDF1	ΔDF2	Ffh-dep				2nd		WT	ΔDF1	ΔDF2	Ffh-dep
		Ara +	9	401	22	15					Ara +	0.02	0.77	0.04	0.03
		Ara -	2	519	21	200					Ara -	0	1	0.04	0.39
	3rd		WT	ΔDF1	ΔDF2	Ffh-dep				3rd		WT	ΔDF1	ΔDF2	Ffh-dep
		Ara +	12	361	24	35					Ara +	0.02	0.71	0.05	0.07
		Ara -	18	511	25	313					Ara -	0.04	1	0.05	0.61
										Average		WT	ΔDF1	ΔDF2	Ffh-dep
											Ara +	0.0433333	0.81	0.04	0.0433333
											Ara -	0.0433333	1	0.0433333	0.49
										S.D.		WT	ΔDF1	ΔDF2	Ffh-dep
											Ara +	0.0404145	0.1249	0.01	0.023094
											Ara -	0.0450925		0.0057735	0.111355
