# Supplementary material for: Fine interaction profiling of VemP and mechanisms responsible for its translocation-coupled arrest-cancelation
Source: eLife journal article supplement (doi:10.7554/elife.62623), 2020-12-15
Supplement: fig4-data1 [file Figure 4-quantified data.xlsx]

## Sheet: Fig 4A
Figure 4A : VemP pulse-chase in an E. coli ΔppiD strain										Met contents		FL-m	2	AP-un	5
														AP-pro	2
	Band Intensity									Mol (Correction of Met content)
	1st	WT			ΔppiD					1st	WT			ΔppiD
	Chase(min)	0.5	1	2	0.5	1	2			Chase(min)	0.5	1	2	0.5	1	2
	FL-m	53.7	61.7	80.6	19.6	19.5	23.5			FL-m	26.9	30.9	40.3	9.8	9.8	11.8
	AP-un	29.4	12.2	4.9	114	75.7	28.5			AP-un	5.9	2.4	1	22.8	15.1	5.7
	AP-pro	97.4	52	28.6	109	85.5	65.8			AP-pro	48.7	26	14.3	54.5	42.8	32.9
										AP (%)	67	47.9	27.5	88.7	85.5	76.6
	2nd	WT			ΔppiD					2nd	WT			ΔppiD
	Chase(min)	0.5	1	2	0.5	1	2			Chase(min)	0.5	1	2	0.5	1	2
	FL-m	43.2	48.8	51.5	18.9	24.2	24.5			FL-m	21.6	24.4	25.6	9.5	12.1	12.3
	AP-un	24.1	9.7	5.3	117	76.9	32			AP-un	4.8	1.9	1.1	23.4	15.4	6.4
	AP-pro	68.6	40.4	23.3	110	92.6	73.3			AP-pro	34.3	20.2	11.7	55	46.3	36.7
										AP (%)	64.4	47.5	33.3	89.2	83.6	77.8
	3rd	WT			ΔppiD					3rd	WT			ΔppiD
	Chase(min)	0.5	1	2	0.5	1	2			Chase(min)	0.5	1	2	0.5	1	2
	FL-m	44.2	55.4	65.1	14.5	18.8	21.8			FL-m	22.1	27.7	32.6	7.3	9.4	10.9
	AP-un	31.7	12.3	4.6	101	63	28.2			AP-un	6.3	2.5	0.9	20.2	12.6	5.6
	AP-pro	84.3	54.3	27.3	94.7	88.9	71			AP-pro	42.2	27.2	13.7	47.4	44.5	35.5
										AP (%)	68.7	51.7	30.9	90.3	85.9	79
	Arrested VemP (%)		Average	Chase	0.5	1	2
				WT	66.7	49	30.6			AP (%) : Arrested VemP (%) = (AP-un + AP-pro)/(FL + AP-un + AP-pro) x 100
				ΔppiD	89.4	85	77.8
			S.D.	Chase	0.5	1	2
				WT	2.16564	2.31805	2.91433
				ΔppiD	0.818535	1.22882	1.2

## Sheet: Fig 4B
Figure 4B : V.SecD2 synthesis in an E. coli ΔppiD strain
Band intensity		1st				2nd				3rd
			vec	WT	WTNaN3		vec	WT	WTNaN3		vec	WT	WTNaN3
		WT	0	1077	4226	WT	0	1191	4700	WT	0	1149	4963
		ΔppiD	0	2748	3265	ΔppiD	0	2796	4916	ΔppiD	0	3271	4443
Relative value		1st				2nd				3rd
WT/WT = 1			vec	WT	WTNaN3		vec	WT	WTNaN3		vec	WT	WTNaN3
		WT	0	1	3.92	WT	0	1	3.95	WT	0	1	4.32
		ΔppiD	0	2.55	3.03	ΔppiD	0	2.35	4.13	ΔppiD	0	2.85	3.87
		Average
			vec	WT	WTNaN3
		WT	0	1	4.06333
		ΔppiD	0	2.58333	3.67667
		S.D.
			vec	WT	WTNaN3
		WT	0	0	0.222785
		ΔppiD	0	0.251661	0.57492

## Sheet: Fig 4C
Figure 4C : V.SecD2 synthesis in a Vibrio ΔppiD strain
	Band intensity
		WT	ΔDF1	ΔDF2	ΔppiD
	1st	0	1961	0	1160
	2nd	0	2240	0	1802
	3rd	0	2984	0	1058
	Relative intensity (ΔDF1 = 1)
		WT	ΔDF1	ΔDF2	ΔppiD
	1st	0	1	0	0.592
	2nd	0	1	0	0.805
	3rd	0	1	0	0.355
		WT	ΔDF1	ΔDF2	ΔppiD
	Average	0	1	0	0.584
	S.D.	0		0	0.225107
