# Supplementary material for: Fine interaction profiling of VemP and mechanisms responsible for its translocation-coupled arrest-cancelation
Source: eLife journal article supplement (doi:10.7554/elife.62623), 2020-12-15
Supplement: fig5-figsupp1-data1 [file Figure 5-figure supplement 1-quantified data.xlsx]

## Sheet: Fig 5-s1A
Figure 5-supple 1A : Pulse-chase analysis of VemPpBPA derivatives																				Met contents		FL-p	5	FL-m	2	AP-un	5	AP-pro	2
																				AP (%) : Arrested VemP (%) = (AP-un + AP-pro)/(FL-p + FL-m + AP-un + AP-pro) x 100
	Band intensity																			Mol (Correction of Met content)
L9-H22		WT	L9	L10	F11	M12	L13	L14	A15	M16	V17	L18	L19	P20	A21	H22					WT	L9	L10	F11	M12	L13	L14	A15	M16	V17	L18	L19	P20	A21	H22
1st	FL-p	0	0	0	2	0	2.2	0	1.2	0	0	0.1	0	149	1.4	191				FL-p	0	0	0	0.4	0	0.4	0	0.2	0	0	0	0	29.8	0.3	38.2
	FL-m	174	36.9	282	191	212	120	253	289	188	201	192	213	0	195	183				FL-m	87	18.5	141	95.5	106	60	127	145	94	101	96	107	0	97.5	91.5
	AP-un	435	204	668	903	133	1110	530	1270	805	533	710	287	1911	512	1380				AP-un	87	40.8	134	181	33.3	222	106	254	201	107	142	57.4	382	102	276
	AP-pro	381	103	439	461	189	520	565	851	448	471	370	373	226	350	109				AP-pro	191	51.5	220	231	94.5	260	283	426	224	236	185	187	113	175	54.5
																				AP (%)	76.2	83.3	71.5	81.1	54.7	88.9	75.4	82.4	81.9	77.3	77.3	69.6	94.3	73.9	71.8
L9-H22		WT	L9	L10	F11	M12	L13	L14	A15	M16	V17	L18	L19	P20	A21	H22					WT	L9	L10	F11	M12	L13	L14	A15	M16	V17	L18	L19	P20	A21	H22
2nd	FL-p	2.2	0.7	0	0	1	0	0	2.3	0	0	0.2	0	73.7	2.3	153				FL-p	0.4	0.1	0	0	0.3	0	0	0.5	0	0	0	0	14.7	0.5	30.6
	FL-m	145	27	194	136	104	73.8	150	175	121	154	144	189	0	186	162				FL-m	72.5	13.5	97	68	52	36.9	75	87.5	60.5	77	72	94.5	0	93	81
	AP-un	454	129	407	752	78.9	867	377	945	483	339	472	225	1242	416	802				AP-un	90.8	25.8	81.4	150	19.7	173	75.4	189	121	67.8	94.4	45	248	83.2	160
	AP-pro	446	95.4	359	483	146	500	423	680	346	357	332	356	320	320	200				AP-pro	223	47.7	180	242	73	250	212	340	173	179	166	178	160	160	100
																				AP (%)	81.1	84.4	72.9	85.2	63.9	92	79.3	85.7	82.9	76.2	78.3	70.2	96.5	72.2	70
V23-S38		WT	V23	F24	A25	A26	Q27	I28	D29	Q30	K31	A32	H33	L34	P35	Y36	F37	S38			WT	V23	F24	A25	A26	Q27	I28	D29	Q30	K31	A32	H33	L34	P35	Y36	F37	S38
1st	FL-p	0	187	4.5	144	100	68.8	22.1	51.6	12.4	0	19.7	13.3	7.8	12.1	11.5	1.9	15.1		FL-p	0	37.4	0.9	28.8	20	13.8	4.4	10.3	2.5	0	3.9	2.7	1.6	2.4	2.3	0.4	3
	FL-m	132	3.2	176	0	50.3	1.4	18.7	18.3	49.6	76.3	64.2	50.4	136	147	158	235	29.4		FL-m	66	1.6	88	0	25.2	0.7	9.4	9.2	24.8	38.2	32.1	25.2	68	73.5	79	118	14.7
	AP-un	497	1220	779	789	630	1980	1380	1530	1580	1190	1310	678	577	444	836	632	651		AP-un	99.4	244	156	158	126	396	276	306	316	238	262	136	115	88.8	167	126	130
	AP-pro	448	196	547	188	165	309	364	138	356	371	305	386	366	319	441	399	303		AP-pro	224	98	274	94	82.5	155	182	69	178	186	153	193	183	160	221	200	152
																				AP (%)	83.1	89.8	82.9	89.7	82.2	97.4	97.1	95.1	94.8	91.7	92	92.2	81.1	76.6	82.7	73.4	94.1
V23-S38		WT	V23	F24	A25	A26	Q27	I28	D29	Q30	K31	A32	H33	L34	P35	Y36	F37	S38			WT	V23	F24	A25	A26	Q27	I28	D29	Q30	K31	A32	H33	L34	P35	Y36	F37	S38
2nd	FL-p	0	121	3.6	83.8	59.6	30.6	4.2	34.4	11	8.3	6.6	0.5	6.8	6.8	5.9	5.1	6.6		FL-p	0	24.2	0.7	16.8	11.9	6.1	0.8	6.9	2.2	1.7	1.3	0.1	1.4	1.4	1.2	1	1.3
	FL-m	129	0	103	0	39.4	0	11.7	17.6	45.7	71.4	31.3	37.7	107	74.4	82.1	169	16.8		FL-m	64.5	0	51.5	0	19.7	0	5.9	8.8	22.9	35.7	15.7	18.9	53.5	37.2	41.1	84.5	8.4
	AP-un	393	685	362	474	450	922	539	676	814	659	522	707	352	241	344	324	392		AP-un	78.6	137	72.4	94.8	90	184	108	135	163	132	104	141	70.4	48.2	68.8	64.8	78.4
	AP-pro	328	106	232	66.9	85.4	191	177	112	301	257	153	249	149	159	146	180	122		AP-pro	164	53	116	33.5	42.7	95.5	88.5	56	151	129	76.5	125	74.5	79.5	73	90	61
																				AP (%)	79	88.7	78.3	88.4	80.8	97.9	96.7	92.4	92.6	87.5	91.4	93.3	72.5	76.8	77	64.4	93.5
K39-S53		WT	K39	L40	Q41	P42	F43	V44	A45	S46	I47	A48	F49	A50	N51	T52	S53				WT	K39	L40	Q41	P42	F43	V44	A45	S46	I47	A48	F49	A50	N51	T52	S53
1st	FL-p	0.2	7.1	3.1	15.4	13.8	3.1	15.1	17.1	15.7	14.4	9	8.9	6.5	13.9	14.8	15.2			FL-p	0	1.4	0.6	3.1	2.8	0.6	3	3.4	3.1	2.9	1.8	1.8	1.3	2.8	3	3
	FL-m	181	137	148	80.3	172	145	77	106	105	60.7	51.3	115	92.1	63.8	70.3	126			FL-m	90.5	68.5	74	40.2	86	72.5	38.5	53	52.5	30.4	25.7	57.5	46.1	31.9	35.2	63
	AP-un	781	821	407	1350	572	567	978	1080	1250	1010	751	518	433	946	608	401			AP-un	156	164	81.4	270	114	113	196	216	250	202	150	104	86.6	189	122	80.2
	AP-pro	536	414	335	322	334	389	391	521	509	416	296	307	303	455	361	339			AP-pro	268	207	168	161	167	195	196	261	255	208	148	154	152	228	181	170
																				AP (%)	82.4	84.2	77	90.9	76	80.8	90.4	89.4	90.1	92.5	91.6	81.3	83.4	92.3	88.8	79.1
K39-S53		WT	K39	L40	Q41	P42	F43	V44	A45	S46	I47	A48	F49	A50	N51	T52	S53				WT	K39	L40	Q41	P42	F43	V44	A45	S46	I47	A48	F49	A50	N51	T52	S53
2nd	FL-p	0.3	4.3	3	9.4	6.2	2.3	11.9	12	6.8	9.1	2.9	5.3	3	5.9	10.7	8.6			FL-p	0.1	0.9	0.6	1.9	1.2	0.5	2.4	2.4	1.4	1.8	0.6	1.1	0.6	1.2	2.1	1.7
	FL-m	139	103	109	53.3	101	121	60	83.9	99.1	87.1	57	91.9	93.1	36.7	57.3	122			FL-m	69.5	51.5	54.5	26.7	50.5	60.5	30	42	49.6	43.6	28.5	46	46.6	18.4	28.7	61
	AP-un	503	460	382	977	447	492	953	797	669	926	697	403	550	584	564	601			AP-un	101	92	76.4	195	89.4	98.4	191	159	134	185	139	80.6	110	117	113	120
	AP-pro	455	333	333	349	271	351	458	450	383	459	304	292	344	415	377	454			AP-pro	228	167	167	175	136	176	229	225	192	230	152	146	172	208	189	227
																				AP (%)	82.5	83.2	81.5	92.8	81.3	81.8	92.8	89.6	86.5	90.1	90.9	82.8	85.7	94.3	90.8	84.7
I54-S69		WT	I54	D55	F56	S57	E58	V59	S60	E61	E62	T63	T64	Q65	S66	P67	I68	S69			WT	I54	D55	F56	S57	E58	V59	S60	E61	E62	T63	T64	Q65	S66	P67	I68	S69
1st	FL-p	0	6.6	13	9	15.1	5.4	19.1	11.2	9.4	5.4	5.5	4.1	8.6	5.4	9.2	4.1	27.5		FL-p	0	1.3	2.6	1.8	3	1.1	3.8	2.2	1.9	1.1	1.1	0.8	1.7	1.1	1.8	0.8	5.5
	FL-m	189	133	188	131	120	149	212	338	75.9	50	71.7	23.7	90.6	56.9	30.2	28	87.5		FL-m	94.5	66.5	94	65.5	60	74.5	106	169	38	25	35.9	11.9	45.3	28.5	15.1	14	43.8
	AP-un	885	759	784	662	1030	521	1530	790	256	45.4	185	43	21.6	44.5	29.5	132	611		AP-un	177	152	157	132	206	104	306	158	51.2	9.1	37	8.6	4.3	8.9	5.9	26.4	122
	AP-pro	610	483	466	433	579	410	688	511	158	31.3	137	35	25.1	39.8	29	101	338		AP-pro	305	242	233	217	290	205	344	256	79	15.7	68.5	17.5	12.6	19.9	14.5	50.5	169
																				AP (%)	83.6	85.3	80.2	83.8	88.7	80.3	85.6	70.8	76.5	48.7	74	67.3	26.5	49.3	54.7	83.9	85.5
I54-S69		WT	I54	D55	F56	S57	E58	V59	S60	E61	E62	T63	T64	Q65	S66	P67	I68	S69			WT	I54	D55	F56	S57	E58	V59	S60	E61	E62	T63	T64	Q65	S66	P67	I68	S69
2nd	FL-p	0.5	5.5	6.5	3.2	9.2	7.3	5.9	6.7	6.2	4.6	6	5.6	4	3.9	6	4	6		FL-p	0.1	1.1	1.3	0.6	1.8	1.5	1.2	1.3	1.2	0.9	1.2	1.1	0.8	0.8	1.2	0.8	1.2
	FL-m	150	101	105	111	65.6	119	111	236	63.5	32.1	75.7	21.7	71.5	57.6	29.7	21.7	56.2		FL-m	75	50.5	52.5	55.5	32.8	59.5	55.5	118	31.8	16.1	37.9	10.9	35.8	28.8	14.9	10.9	28.1
	AP-un	516	361	415	339	565	475	773	570	228	19.3	169	38.3	15.9	32.7	19.5	91.5	431		AP-un	103	72.2	83	67.8	113	95	155	114	45.6	4	33.8	7.7	3.2	6.5	3.9	18.3	86.2
	AP-pro	446	312	295	307	386	372	433	410	136	18.9	119	36.5	14.1	32.4	16.3	74.6	274		AP-pro	223	156	148	154	193	186	217	205	68	9.5	59.5	18.3	7.1	16.2	8.2	37.3	137
																				AP (%)	81.3	81.6	81.1	79.8	89.8	82.2	86.8	72.8	77.5	44.3	70.5	68.4	22	43.4	42.9	82.6	88.4
E70-Q84		WT	E70	S71	H72	A73	R74	L75	D76	T77	L78	A79	L80	F81	N82	T83	Q84				WT	E70	S71	H72	A73	R74	L75	D76	T77	L78	A79	L80	F81	N82	T83	Q84
1st	FL-p	8.8	8	10.2	23.2	33.3	20.8	33.8	18.2	22.4	33.2	10.9	10.3	27.3	23	22.5	21.9			FL-p	1.8	1.6	2	4.6	6.7	4.2	6.7	3.6	4.5	6.6	2.2	2.1	5.5	4.6	4.5	4.4
	FL-m	168	51.4	62.3	51.5	53.8	81.3	41	33.9	64.1	78.9	104	235	92.9	126	152	119			FL-m	84	25.7	31.2	25.8	26.9	40.7	20.5	17	32.1	39.5	52	118	46.5	63	76	59.5
	AP-un	686	215	284	361	615	474	413	307	451	564	294	173	508	291	438	508			AP-un	137	43	56.8	72.2	123	94.8	82.6	61.4	90.2	113	58.8	34.6	102	58.2	87.6	102
	AP-pro	486	140	195	209	252	320	203	157	297	307	313	178	318	228	317	373			AP-pro	243	70	97.5	105	126	160	102	78.5	149	154	157	89	159	114	159	187
																				AP (%)	81.6	80.5	82.3	85.4	88.1	85	87.2	87.2	86.7	85.3	79.9	50.7	83.4	71.8	75.4	81.9
E70-Q84		WT	E70	S71	H72	A73	R74	L75	D76	T77	L78	A79	L80	F81	N82	T83	Q84				WT	E70	S71	H72	A73	R74	L75	D76	T77	L78	A79	L80	F81	N82	T83	Q84
2nd	FL-p	9.2	6.8	9.8	20.5	28.3	26.1	39.7	19.8	19.9	29.5	9.6	12	19.9	22	22	26.2			FL-p	1.8	1.4	2	4.1	5.7	5.2	7.9	4	4	5.9	1.9	2.4	4	4.4	4.4	5.2
	FL-m	155	51	48.8	46.8	34.8	84.1	37.6	24.1	55	74.2	107	157	81.5	110	155	101			FL-m	77.5	25.5	24.4	23.4	17.4	42.1	18.8	12.1	27.5	37.1	53.5	78.5	40.8	55	77.5	50.5
	AP-un	599	185	228	403	556	492	432	308	319	499	222	142	391	283	440	516			AP-un	120	37	45.6	80.6	111	98.4	86.4	61.6	63.8	99.8	44.4	28.4	78.2	56.6	88	103
	AP-pro	442	155	176	267	275	352	236	165	250	297	287	165	288	238	329	370			AP-pro	221	77.5	88	134	138	176	118	82.5	125	149	144	82.5	144	119	165	185
																				AP (%)	81.1	81	83.5	88.6	91.5	85.3	88.5	90	85.7	85.3	77.3	57.8	83.2	74.7	75.5	83.8
E70-Q84		WT	R85	W86	V87	S88	H89	L90	R91	E92	G93	L94	D95	D96	E97	H98	V99	D100			WT	R85	W86	V87	S88	H89	L90	R91	E92	G93	L94	D95	D96	E97	H98	V99	D100
1st	FL-p	0	10.7	20.4	8.2	22.7	14.6	20.3	10.1	13.5	1.8	12.8	9	8.7	7.7	15.6	52.1	55.3		FL-p	0	2.1	4.1	1.6	4.5	2.9	4.1	2	2.7	0.4	2.6	1.8	1.7	1.5	3.1	10.4	11.1
	FL-m	174	817	96.6	39.9	114	287	251	260	216	109	158	273	260	280	123	104	314		FL-m	87	409	48.3	20	57	144	126	130	108	54.5	79	137	130	140	61.5	52	157
	AP-un	733	147	411	409	582	416	590	247	281	255	356	180	121	78.8	135	553	891		AP-un	125	22	62.2	63.6	97.6	78.2	73.2	54.6	44.4	53.2	60.2	39	31.2	17	47.8	102	158
	AP-pro	623	110	311	318	488	391	366	273	222	266	301	195	156	84.8	239	511	792		AP-pro	311	55	156	159	244	196	183	137	111	133	151	97.5	78	42.4	120	256	396
																				AP (%)	83.4	15.8	80.6	91.2	84.7	65.1	66.3	59.2	58.4	77.2	72.1	49.6	45.3	29.6	72.2	85.2	76.7
E70-Q84		WT	R85	W86	V87	S88	H89	L90	R91	E92	G93	L94	D95	D96	E97	H98	V99	D100			WT	R85	W86	V87	S88	H89	L90	R91	E92	G93	L94	D95	D96	E97	H98	V99	D100
2nd	FL-p	6.9	12.6	12.2	11	20.5	11.9	17.8	8.8	13.4	4.4	0	8.2	8.7	8.2	14.9	36.3	42.9		FL-p	1.4	2.5	2.4	2.2	4.1	2.4	3.6	1.8	2.7	0.9	0	1.6	1.7	1.6	3	7.3	8.6
	FL-m	160	796	66.3	51	95	247	225	255	227	119	146	222	213	235	114	67.4	249		FL-m	80	398	33.2	25.5	47.5	124	113	128	114	59.5	73	111	107	118	57	33.7	125
	AP-un	639	114	283	544	525	348	571	283	287	228	247	120	108	75.6	175	505	706		AP-un	128	22.8	56.6	109	105	69.6	114	56.6	57.4	45.6	49.4	24	21.6	15.1	35	101	141
	AP-pro	514	86.1	237	356	440	289	377	297	235	244	245	152	147	95.3	227	506	574		AP-pro	257	43.1	119	178	220	145	189	149	118	122	123	76	74	47.7	114	253	287
																				AP (%)	82.6	14.1	83.1	91.2	86.3	62.9	72.2	61.3	60.1	73.5	70.3	47	46.8	34.4	71.3	89.6	76.2
V101-Y115		WT	V101	V102	G103	D104	L105	N106	T107	P108	F109	Y110	V111	D112	A113	G114	Y115				WT	V101	V102	G103	D104	L105	N106	T107	P108	F109	Y110	V111	D112	A113	G114	Y115
1st	FL-p	7.6	20.3	39.3	19.9	14.1	24.4	14.6	16.9	22.9	12.4	13.3	14.5	6.1	36.9	15.2	12.6			FL-p	1.5	4.1	7.9	4	2.8	4.9	2.9	3.4	4.6	2.5	2.7	2.9	1.2	7.4	3	2.5
	FL-m	184	101	37.8	279	158	207	230	269	323	261	460	149	412	417	461	373			FL-m	92	50.5	18.9	140	79	104	115	135	162	131	230	74.5	206	209	231	187
	AP-un	866	458	886	460	296	569	633	373	472	651	498	626	492	1600	476	541			AP-un	173	91.6	177	92	59.2	114	127	74.6	94.4	130	99.6	125	98.4	320	95.2	108
	AP-pro	634	554	656	543	423	672	720	509	613	775	609	746	675	1090	437	597			AP-pro	317	277	328	272	212	336	360	255	307	388	305	373	338	545	219	299
																				AP (%)	84	87.1	95	71.7	76.8	80.5	80.5	70.4	70.7	79.5	63.5	86.6	67.8	80	57.3	68.2
V101-Y115		WT	V101	V102	G103	D104	L105	N106	T107	P108	F109	Y110	V111	D112	A113	G114	Y115				WT	V101	V102	G103	D104	L105	N106	T107	P108	F109	Y110	V111	D112	A113	G114	Y115
2nd	FL-p	4.1	10.8	22.5	12.1	10.3	15.4	5.6	7.9	7.2	6.3	7.7	9.7	1.2	13.7	3.6	5.2			FL-p	0.8	2.2	4.5	2.4	2.1	3.1	1.1	1.6	1.4	1.3	1.5	1.9	0.2	2.7	0.7	1
	FL-m	151	72.8	33.3	224	155	164	162	236	302	235	302	114	284	259	318	185			FL-m	75.5	36.4	16.7	112	77.5	82	81	118	151	118	151	57	142	130	159	92.5
	AP-un	540	295	471	342	294	415	419	293	430	485	343	458	371	978	265	292			AP-un	108	59	94.2	68.4	58.8	83	83.8	58.6	86	97	68.6	91.6	74.2	196	53	58.4
	AP-pro	467	365	344	378	336	488	497	390	464	557	448	553	421	764	304	378			AP-pro	234	183	172	189	168	244	249	195	232	279	224	277	211	382	152	189
																				AP (%)	81.8	86.2	92.6	69.2	74	79.4	80.2	68	67.6	75.9	65.7	86.2	66.7	81.3	56.2	72.6
A116-F131		WT	A116	Y117	S118	L119	M120	D121	I122	N123	W124	R125	Q126	N127	Q128	Y129	T130	F131			WT	A116	Y117	S118	L119	M120	D121	I122	N123	W124	R125	Q126	N127	Q128	Y129	T130	F131
1st	FL-p	4.3	3.5	1	10.4	9.2	1.2	6.4	5.7	23	10.3	0	5.4	0	15.6	13.8	7	9		FL-p	0.9	0.7	0.2	2.1	1.8	0.3	1.3	1.1	4.6	2.1	0	1.1	0	3.1	2.8	1.4	1.8
	FL-m	226	521	517	819	499	188	382	479	359	443	669	587	431	327	102	522	527		FL-m	113	261	259	410	250	188	191	240	180	222	335	294	216	164	51	261	264
	AP-un	810	784	588	650	602	308	788	493	1400	880	773	500	569	1080	1280	335	491		AP-un	162	157	118	130	120	77	158	98.6	280	176	155	100	114	216	256	67	98.2
	AP-pro	606	630	535	582	557	256	646	647	972	865	739	579	713	866	812	463	580		AP-pro	303	315	268	291	279	256	323	324	486	433	370	290	357	433	406	232	290
																				AP (%)	80.3	64.3	59.8	50.5	61.3	63.9	71.4	63.7	80.6	73.1	61.1	56.9	68.6	79.5	92.5	53.3	59.4
A116-F131		WT	A116	Y117	S118	L119	M120	D121	I122	N123	W124	R125	Q126	N127	Q128	Y129	T130	F131			WT	A116	Y117	S118	L119	M120	D121	I122	N123	W124	R125	Q126	N127	Q128	Y129	T130	F131
2nd	FL-p	0.4	0	5.4	3.3	3.4	5.7	2.2	0	0	3.7	2.1	5.1	0	2.1	4.8	1.5	2.1		FL-p	0.1	0	1.1	0.7	0.7	1.4	0.4	0	0	0.7	0.4	1	0	0.4	1	0.3	0.4
	FL-m	155	407	464	649	350	179	317	429	260	304	517	484	355	196	97.6	271	285		FL-m	77.5	204	232	325	175	179	159	215	130	152	259	242	178	98	48.8	136	143
	AP-un	552	596	360	459	359	341	604	506	818	484	542	395	460	798	709	228	313		AP-un	110	119	72	91.8	71.8	85.3	121	101	164	96.8	108	79	92	160	142	45.6	62.6
	AP-pro	507	493	393	453	469	312	593	629	659	498	544	459	548	635	619	343	378		AP-pro	254	247	197	227	235	312	297	315	330	249	272	230	274	318	310	172	189
																				AP (%)	82.4	64.2	53.6	49.5	63.6	68.9	72.4	65.9	79.2	69.4	59.4	56	67.3	82.9	90.1	61.5	63.7
Y132-D137		WT	Y132	H133	F134	T135	S136	D137													WT	Y132	H133	F134	T135	S136	D137
1st	FL-p	7.1	4.4	6.9	36.9	20.6	28.6	11.6												FL-p	1.4	0.9	1.4	7.4	4.1	5.7	2.3
	FL-m	145	130	221	889	163	835	52.3												FL-m	72.5	65	111	445	81.5	418	26.2
	AP-un	560	806	507	357	654	204	502												AP-un	112	161	101	71.4	131	40.8	100
	AP-pro	467	620	514	345	538	215	542												AP-pro	234	310	257	173	269	108	271
																				AP (%)	82.4	87.7	76.1	35.1	82.4	26	92.9
Y132-D137		WT	Y132	H133	F134	T135	S136	D137													WT	Y132	H133	F134	T135	S136	D137
2nd	FL-p	4.5	2	9.4	7.6	2.7	7	5.4												FL-p	0.9	0.4	1.9	1.5	0.5	1.4	1.1
	FL-m	187	110	192	525	92.9	511	48.4												FL-m	93.5	55	96	263	46.5	256	24.2
	AP-un	621	719	446	288	510	159	452												AP-un	124	144	89.2	57.6	102	31.8	90.4
	AP-pro	580	653	526	312	497	226	489												AP-pro	290	327	263	156	249	113	245
																				AP (%)	81.4	89.5	78.3	44.7	88.2	36	93

## Sheet: s1A-summary
Figure 5-supple 1A Summary
	Arrested VemP(%)
		WT	L9	L10	F11	M12	L13	L14	A15	M16	V17	L18	L19	P20	A21	H22	V23	F24	A25	A26	Q27	I28	D29	Q30	K31	A32	H33	L34	P35	Y36	F37	S38	K39	L40	Q41	P42	F43	V44	A45	S46	I47	A48	F49	A50	N51	T52	S53	I54	D55
		76.2	83.3	71.5	81.1	54.7	88.9	75.4	82.4	81.9	77.3	77.3	69.6	94.3	73.9	71.8	89.8	82.9	89.7	82.2	97.4	97.1	95.1	94.8	91.7	92	92.2	81.1	76.6	82.7	73.4	94.1	84.2	77	90.9	76	80.8	90.4	89.4	90.1	92.5	91.6	81.3	83.4	92.3	88.8	79.1	85.3	80.2
		81.1	84.4	72.9	85.2	63.9	92	79.3	85.7	82.9	76.2	78.3	70.2	96.5	72.2	70	88.7	78.3	88.4	80.8	97.9	96.7	92.4	92.6	87.5	91.4	93.3	72.5	76.8	77	64.4	93.5	83.2	81.5	92.8	81.3	81.8	92.8	89.6	86.5	90.1	90.9	82.8	85.7	94.3	90.8	84.7	81.6	81.1
		83.1
		79
		82.4
		82.5
		83.6
		81.3
		81.6
		81.1
		83.4
		82.6
		84
		81.8
		80.3
		82.4
		82.4
		81.4
		WT	L9	L10	F11	M12	L13	L14	A15	M16	V17	L18	L19	P20	A21	H22	V23	F24	A25	A26	Q27	I28	D29	Q30	K31	A32	H33	L34	P35	Y36	F37	S38	K39	L40	Q41	P42	F43	V44	A45	S46	I47	A48	F49	A50	N51	T52	S53	I54	D55
	Average	81.6778	83.85	72.2	83.15	59.3	90.45	77.35	84.05	82.4	76.75	77.8	69.9	95.4	73.05	70.9	89.25	80.6	89.05	81.5	97.65	96.9	93.75	93.7	89.6	91.7	92.75	76.8	76.7	79.85	68.9	93.8	83.7	79.25	91.85	78.65	81.3	91.6	89.5	88.3	91.3	91.25	82.05	84.55	93.3	89.8	81.9	83.45	80.65
	S.D.	1.83353	0.777817	0.989949	2.89914	6.50538	2.19203	2.75772	2.33345	0.707107	0.777817	0.707107	0.424264	1.55563	1.20208	1.27279	0.777817	3.25269	0.919239	0.989949	0.353553	0.282843	1.90919	1.55563	2.96985	0.424264	0.777817	6.08112	0.141421	4.03051	6.36396	0.424264	0.707107	3.18198	1.3435	3.74767	0.707107	1.69706	0.141421	2.54558	1.69706	0.494975	1.06066	1.62635	1.41421	1.41421	3.9598	2.6163	0.636396
[truncated: 82 more columns]

## Sheet: Fig 5-s1B
Figure 5-supple 1B : Pulse-chase analysis of VemP Trp mutants																					Met contents		FL-p	5	FL-m	2	AP-un	5	AP-pro	2
																					AP (%) : Arrested VemP (%) = (AP-un + AP-pro)/(FL-p + FL-m + AP-un + AP-pro) x 100
	Band intensity																				Mol (Correction of Met content)
1st		WT	W143A	V23W	A25W	A26W	I28W	K31W	S38W	Q65W	L75W	D76W	L80W	R85W	D95W	D96W	E97W	F134W	S136W			WT	W143A	V23W	A25W	A26W	I28W	K31W	S38W	Q65W	L75W	D76W	L80W	R85W	D95W	D96W	E97W	F134W	S136W
	FL-p	0	0	96.5	69.4	22.8	0	4.9	2.6	3.2	2	2.6	0	1.3	0.3	1.5	2	0	2.6		FL-p	0	0	19.3	13.9	4.6	0	1	0.5	0.6	0.4	0.5	0	0.3	0.1	0.3	0.4	0	0.5
	FL-m	69.3	253	0	0	63.1	69.4	64.6	73.4	48.8	55.9	14.9	211	217	109	111	89.4	115	136		FL-m	34.7	127	0	0	31.6	34.7	32.3	36.7	24.4	28	7.5	106	109	54.5	55.5	44.7	57.5	68
	AP-un	35.3	12.5	439	282	207	63.9	63.1	46.7	4.9	54.2	37.2	45.7	9.4	13	14.3	12.4	48.9	26.2		AP-un	7.1	2.5	87.8	56.4	41.4	12.8	12.6	9.3	1	10.8	7.4	9.1	1.9	2.6	2.9	2.5	9.8	5.2
	AP-pro	133	20.5	217	135	120	136	96	127	16.1	163	107	87.5	15.3	53.3	50	38.5	160	93.7		AP-pro	66.5	10.3	109	67.5	60	68	48	63.5	8.1	81.5	53.5	43.8	7.7	26.7	25	19.3	80	46.9
																					AP (%)	68	9.2	91.1	89.9	73.7	70	64.5	66.2	26.7	76.5	88.4	33.3	8.1	34.9	33.3	32.6	61	43.2
2nd		WT	W143A	V23W	A25W	A26W	I28W	K31W	S38W	Q65W	L75W	D76W	L80W	R85W	D95W	D96W	E97W	F134W	S136W			WT	W143A	V23W	A25W	A26W	I28W	K31W	S38W	Q65W	L75W	D76W	L80W	R85W	D95W	D96W	E97W	F134W	S136W
	FL-p	0	2.4	78.2	53	19.1	1.9	0.9	1.5	3	1.1	1.2	1.1	3.3	3	1.2	1.7	0.8	3		FL-p	0	0.5	15.6	10.6	3.8	0.4	0.2	0.3	0.6	0.2	0.2	0.2	0.7	0.6	0.2	0.3	0.2	0.6
	FL-m	51.7	250	0	0	57	59.3	60.1	62.3	36.8	45.2	9.5	186	159	97.3	92.7	115	93.1	121		FL-m	25.9	125	0	0	28.5	29.7	30.1	31.2	18.4	22.6	4.8	93	79.5	48.7	46.4	57.5	46.6	60.5
	AP-un	28.2	17.1	344	242	202	67.9	63	50.8	4	48.6	37.3	45.2	10.2	11.6	11.6	15	39.2	32.1		AP-un	5.6	3.4	68.8	48.4	40.4	13.6	12.6	10.2	0.8	9.7	7.5	9	2	2.3	2.3	3	7.8	6.4
	AP-pro	95.4	20.2	193	126	116	124	92	118	14.6	124	76.4	78.7	19.3	40.6	40.6	47.8	107	80.1		AP-pro	47.7	10.1	96.5	63	58	62	46	59	7.3	62	38.2	39.4	9.7	20.3	20.3	23.9	53.5	40.1
																					AP (%)	67.3	9.7	91.4	91.3	75.3	71.5	65.9	68.7	29.9	75.9	90.1	34.2	12.7	31.4	32.7	31.8	56.7	43.2
																					Arrested VemP (%)
																						WT	W143A	V23W	A25W	A26W	I28W	K31W	S38W	Q65W	L75W	D76W	L80W	R85W	D95W	D96W	E97W	F134W	S136W
																					Average	67.7	9.5	91.3	90.6	74.5	70.8	65.2	67.5	28.3	76.2	89.3	33.8	10.4	33.2	33	32.2	58.9	43.2
																					S.D.	0.495	0.354	0.212	0.99	1.131	1.061	0.99	1.768	2.263	0.424	1.202	0.636	3.253	2.475	0.424	0.566	3.041	0

## Sheet: Fig 5-s1C
Figure 5-supple 1 : Effect of VemP R85W mutation on the expression of downstream SecD2 expression
		Band intensity						Relative value
			vec	WT	W143A	R85W			vec	WT	W143A	R85W
		1st	0	652	348	153		1st	0	1	0.534	0.235
		2nd	0	811	414	173		2nd	0	1	0.511	0.213
		3rd	0	729	395	179		3rd	0	1	0.542	0.246
									vec	WT	W143A	R85W
								Average	0	1	0.529	0.231333
								S.D.	0		0.0160935	0.0168028
