# Supplementary material for: Fine interaction profiling of VemP and mechanisms responsible for its translocation-coupled arrest-cancelation
Source: eLife journal article supplement (doi:10.7554/elife.62623), 2020-12-15
Supplement: fig5-figsupp2-data1 [file Figure 5-figure supplement 2-quantified data.xlsx]

## Sheet: Fig5-s2
Figure 5-supplement 2
VemP-R85W/W143A in ΔppiD				201028
Band intensity		1st	WT				ΔppiD					2nd	WT				ΔppiD
			WT	W143A	R85W	double	WT	W143A	R85W	double			WT	W143A	R85W	double	WT	W143A	R85W	double
		FL-m	145	517	409	341	45.4	272	189	405		FL-m	136	554	449	475	46.8	442	254	618
		AP-pro	102	41.7	19.8	14.3	258	137	228	57.3		AP-pro	120	52.8	31.4	18.1	324	236	340	94.7
		AP-un	268	34.6	19.8	18.9	257	94.4	202	16.9		AP-un	356	42	32.3	16.6	363	138	328	27.3
Mol		1st	WT				ΔppiD					2nd	WT				ΔppiD
			WT	W143A	R85W	double	WT	W143A	R85W	double			WT	W143A	R85W	double	WT	W143A	R85W	double
		FL-m	72.5	259	205	171	22.7	136	94.5	203		FL-m	68	277	225	238	23.4	221	127	309
		AP-pro	20.4	8.3	4	2.9	51.6	27.4	45.6	11.5		AP-pro	24	10.6	6.3	3.6	64.8	47.2	68	18.9
		AP-un	134	17.3	9.9	9.5	129	47.2	101	8.5		AP-un	178	21	16.2	8.3	182	69	164	13.7
	AP(%)		WT				ΔppiD
			WT	W143A	R85W	double	WT	W143A	R85W	double
		1st	68	9	6.3	6.8	88.8	35.4	60.8	9
		2nd	74.8	10.2	9.1	4.8	91.3	34.5	64.6	9.5
		Average	WT				ΔppiD					Std	WT				ΔppiD
			WT	W143A	R85W	double	WT	W143A	R85W	double			WT	W143A	R85W	double	WT	W143A	R85W	double
			71.4	9.6	7.7	5.8	90.1	35	62.7	9.3			4.808	0.849	1.98	1.414	1.768	0.636	2.687	0.354
