# Supplementary figures and images for: Fine interaction profiling of VemP and mechanisms responsible for its translocation-coupled arrest-cancelation
Source: eLife journal article supplement (doi:10.7554/elife.62623), 2020-12-15

Figure 3 Source data

A

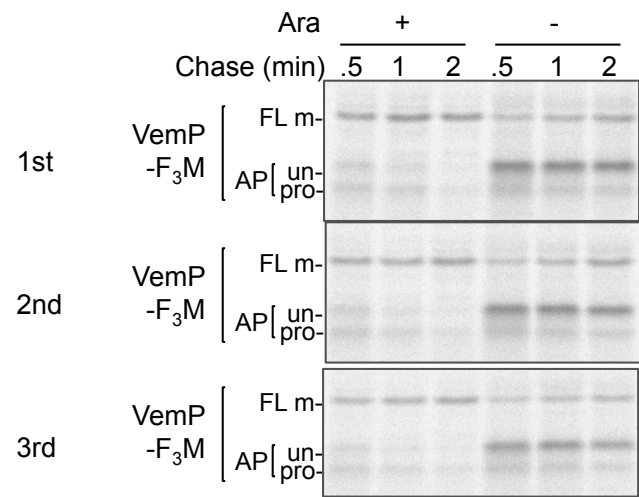

B

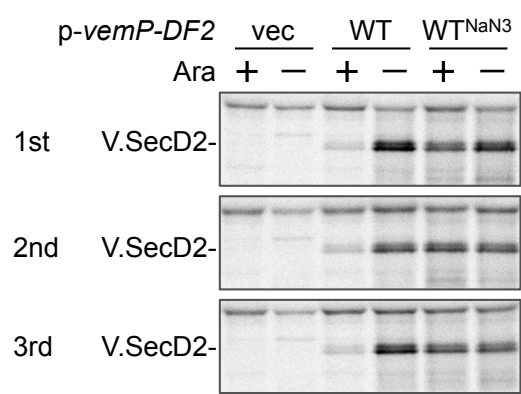

C

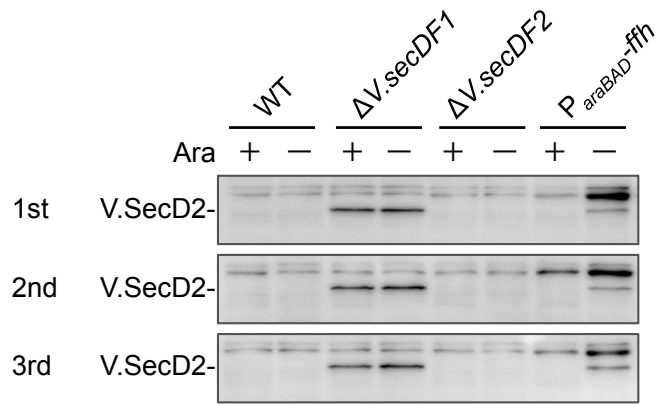

Supplement: supp [file elife-62623-supp-v1.zip]

Figure 5-supple 2 Source data

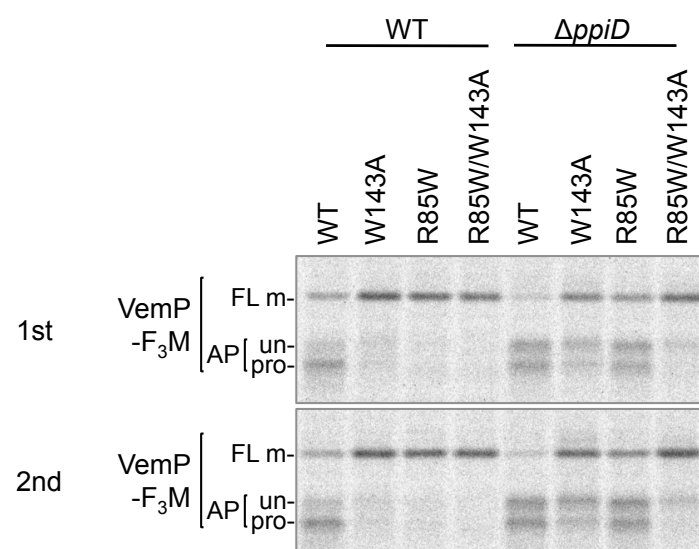

Supplement: supp [file elife-62623-supp-v1.zip]

# Figure 5-supple 1 Source data

A

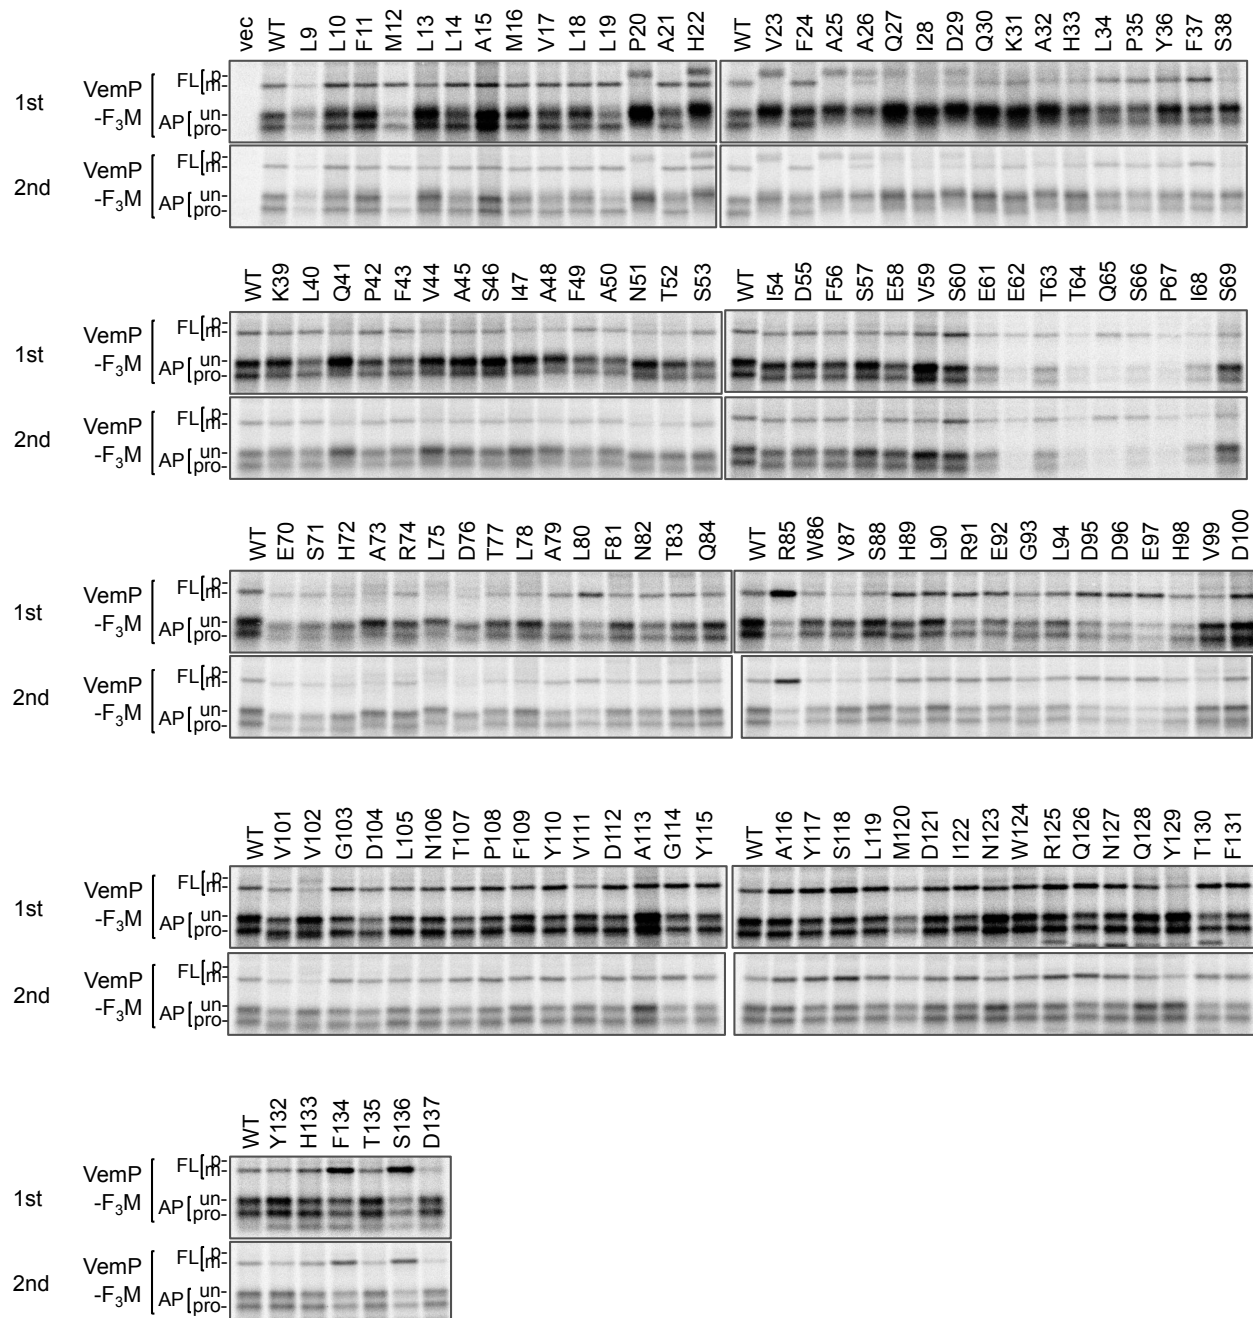

Figure 5-supple 1 Source data

B

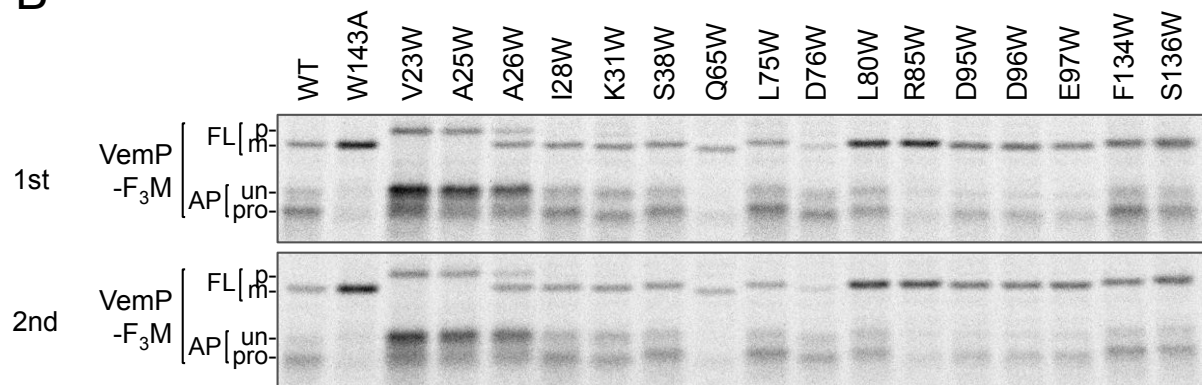

C

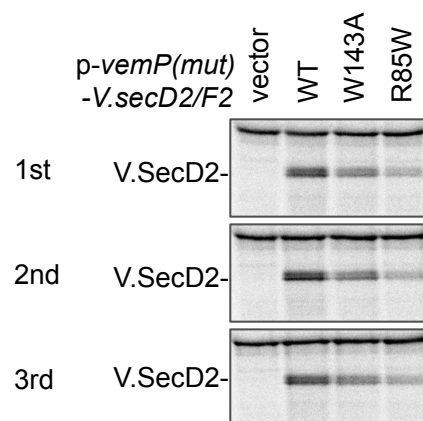

Supplement: supp [file elife-62623-supp-v1.zip]

Figure 2-supple 2 Source data

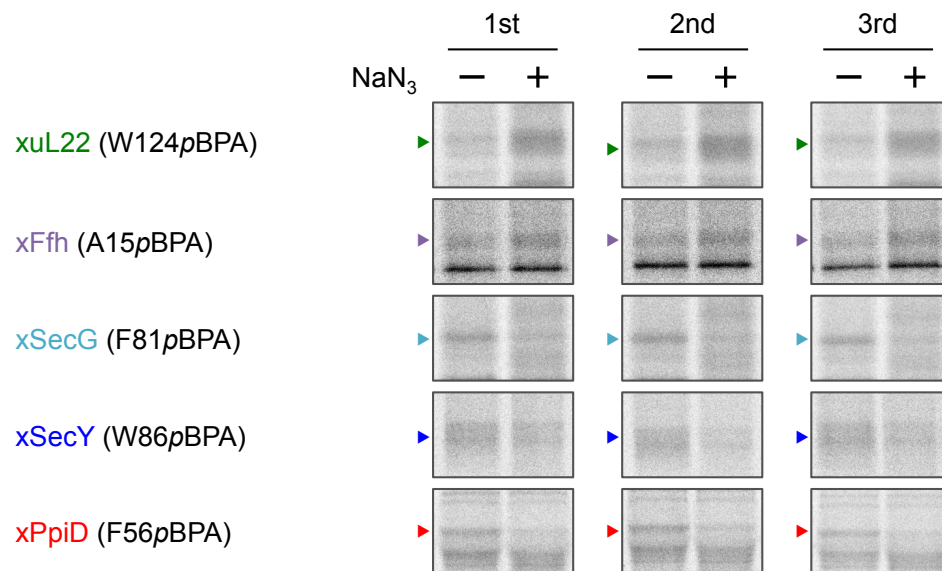

Supplement: supp [file elife-62623-supp-v1.zip]

Figure 2-supple 4 Source data

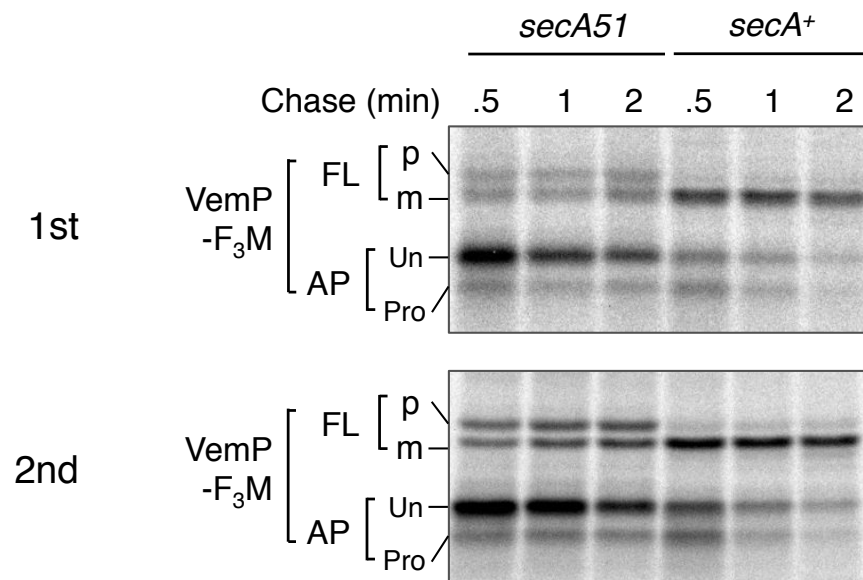

Supplement: supp [file elife-62623-supp-v1.zip]

Figure 4 Source data

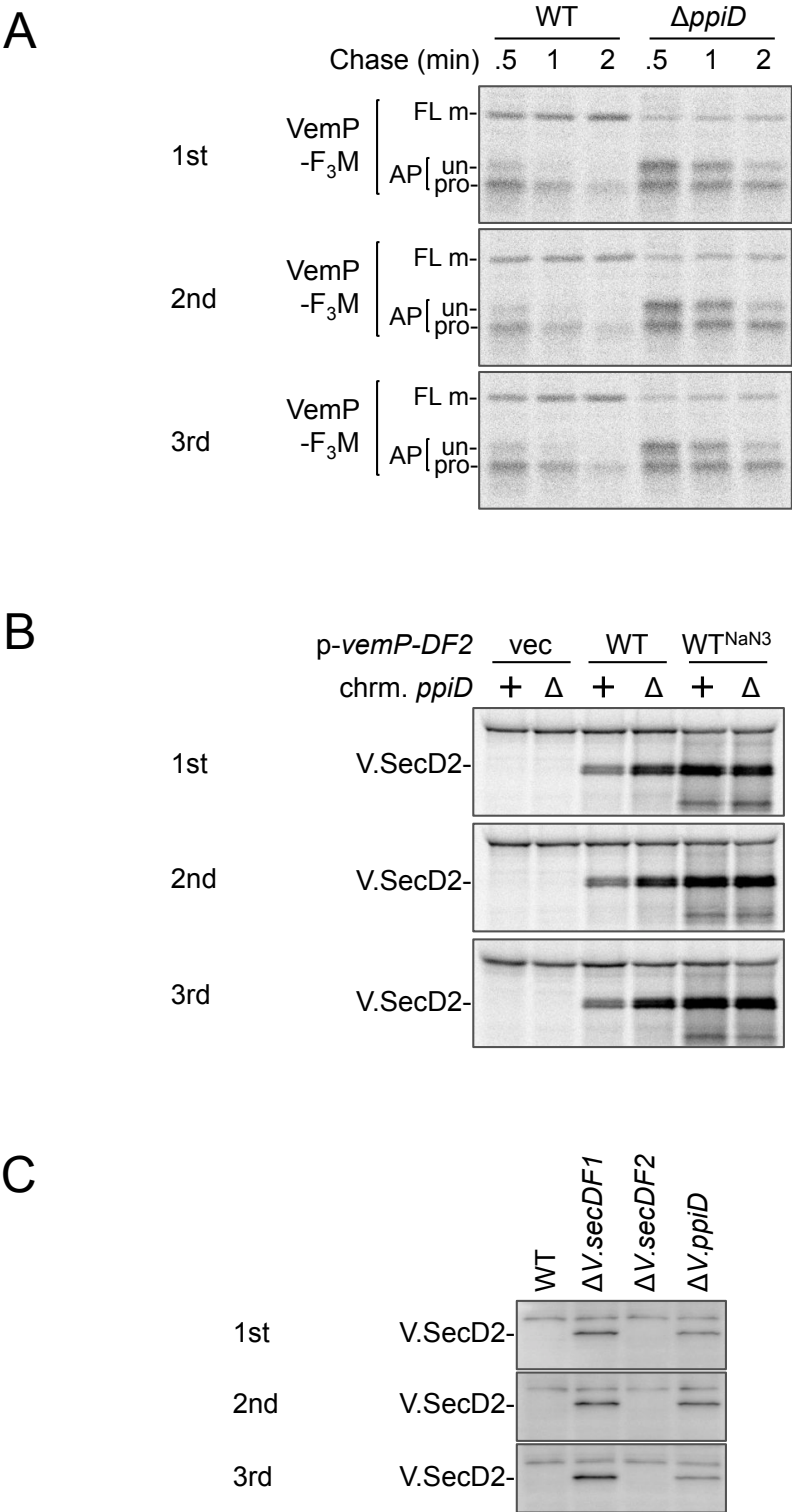

Supplement: supp [file elife-62623-supp-v1.zip]

Figure 2-supple 1 Source data

A

WT strain

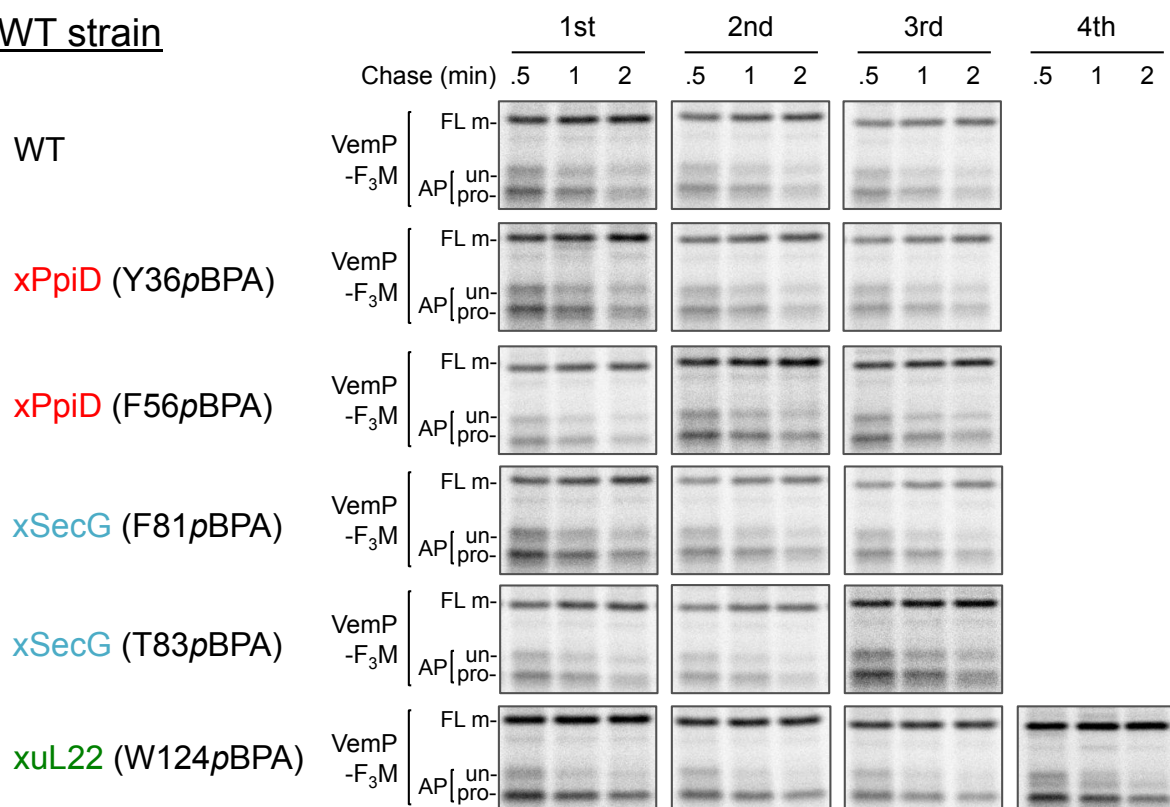

ffh-his<sub>10</sub> strain

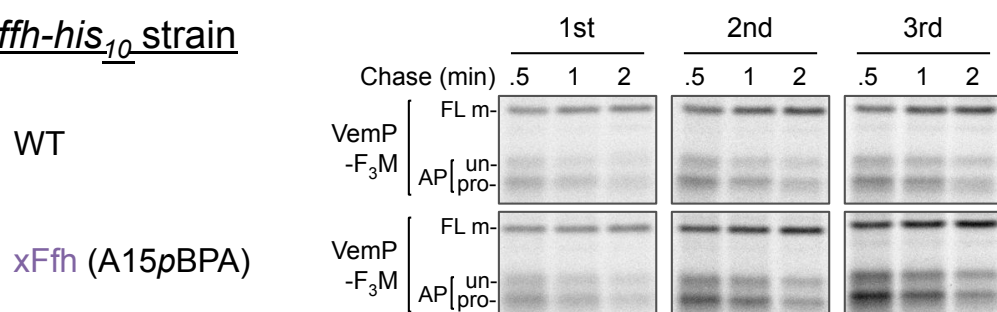

Supplement: supp [file elife-62623-supp-v1.zip]

Figure 2 Source data

B

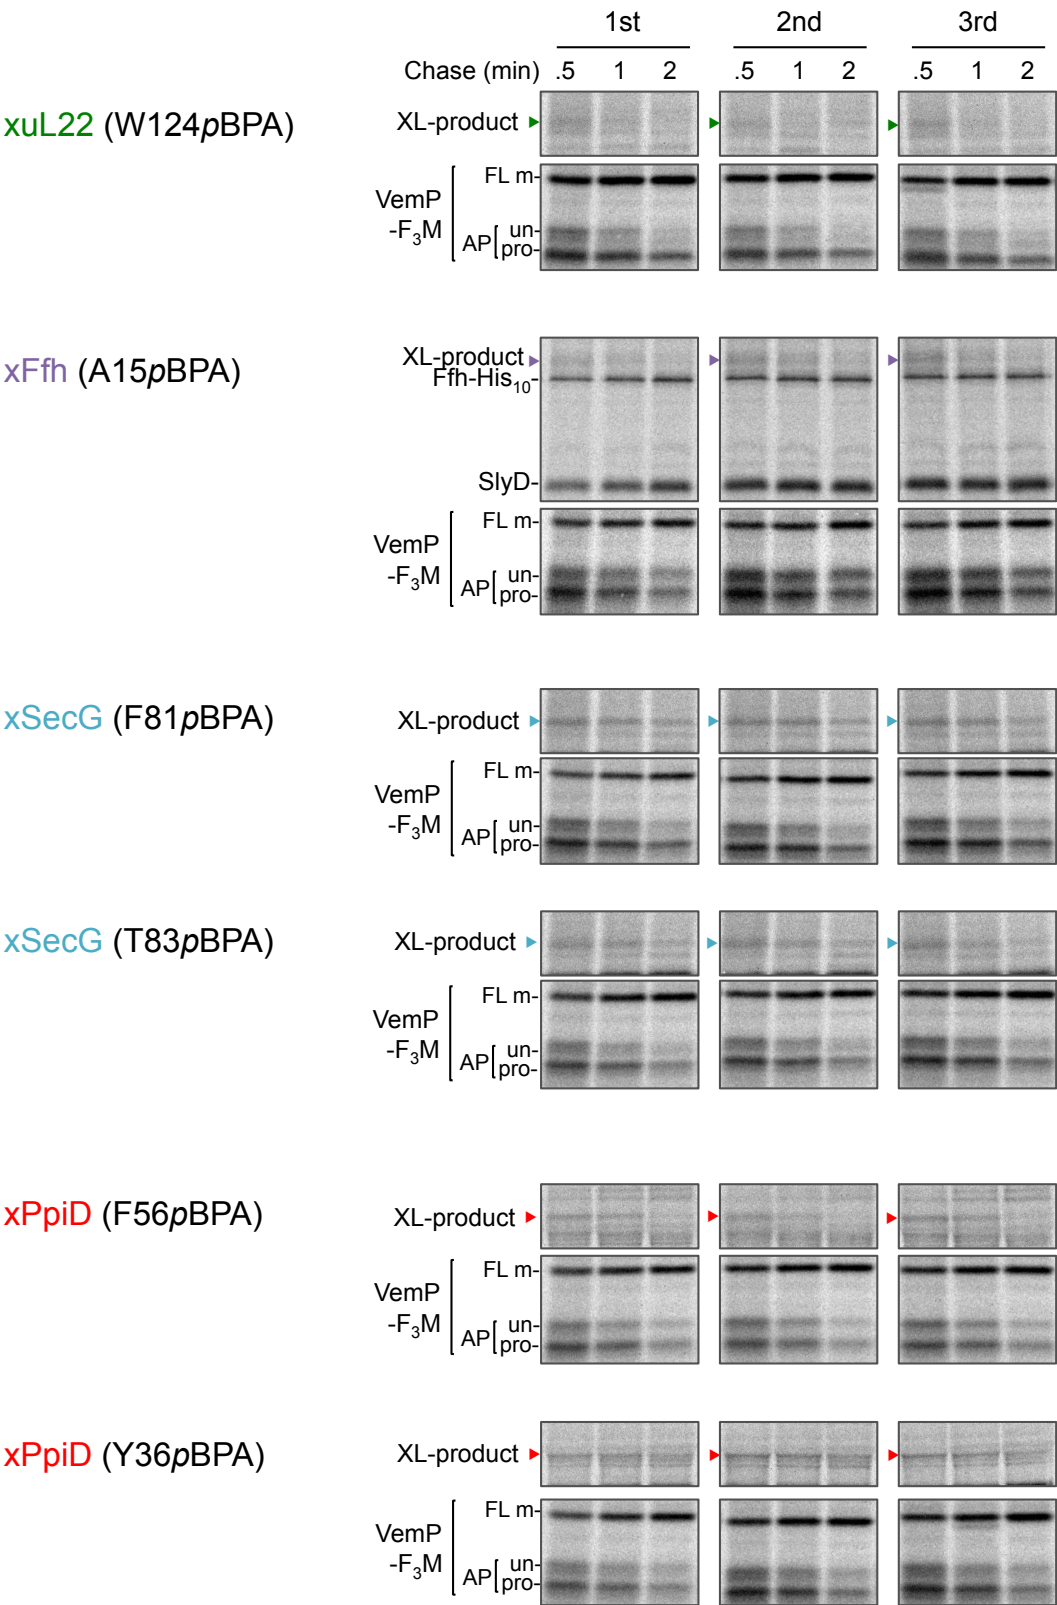

Figure 2 Source data

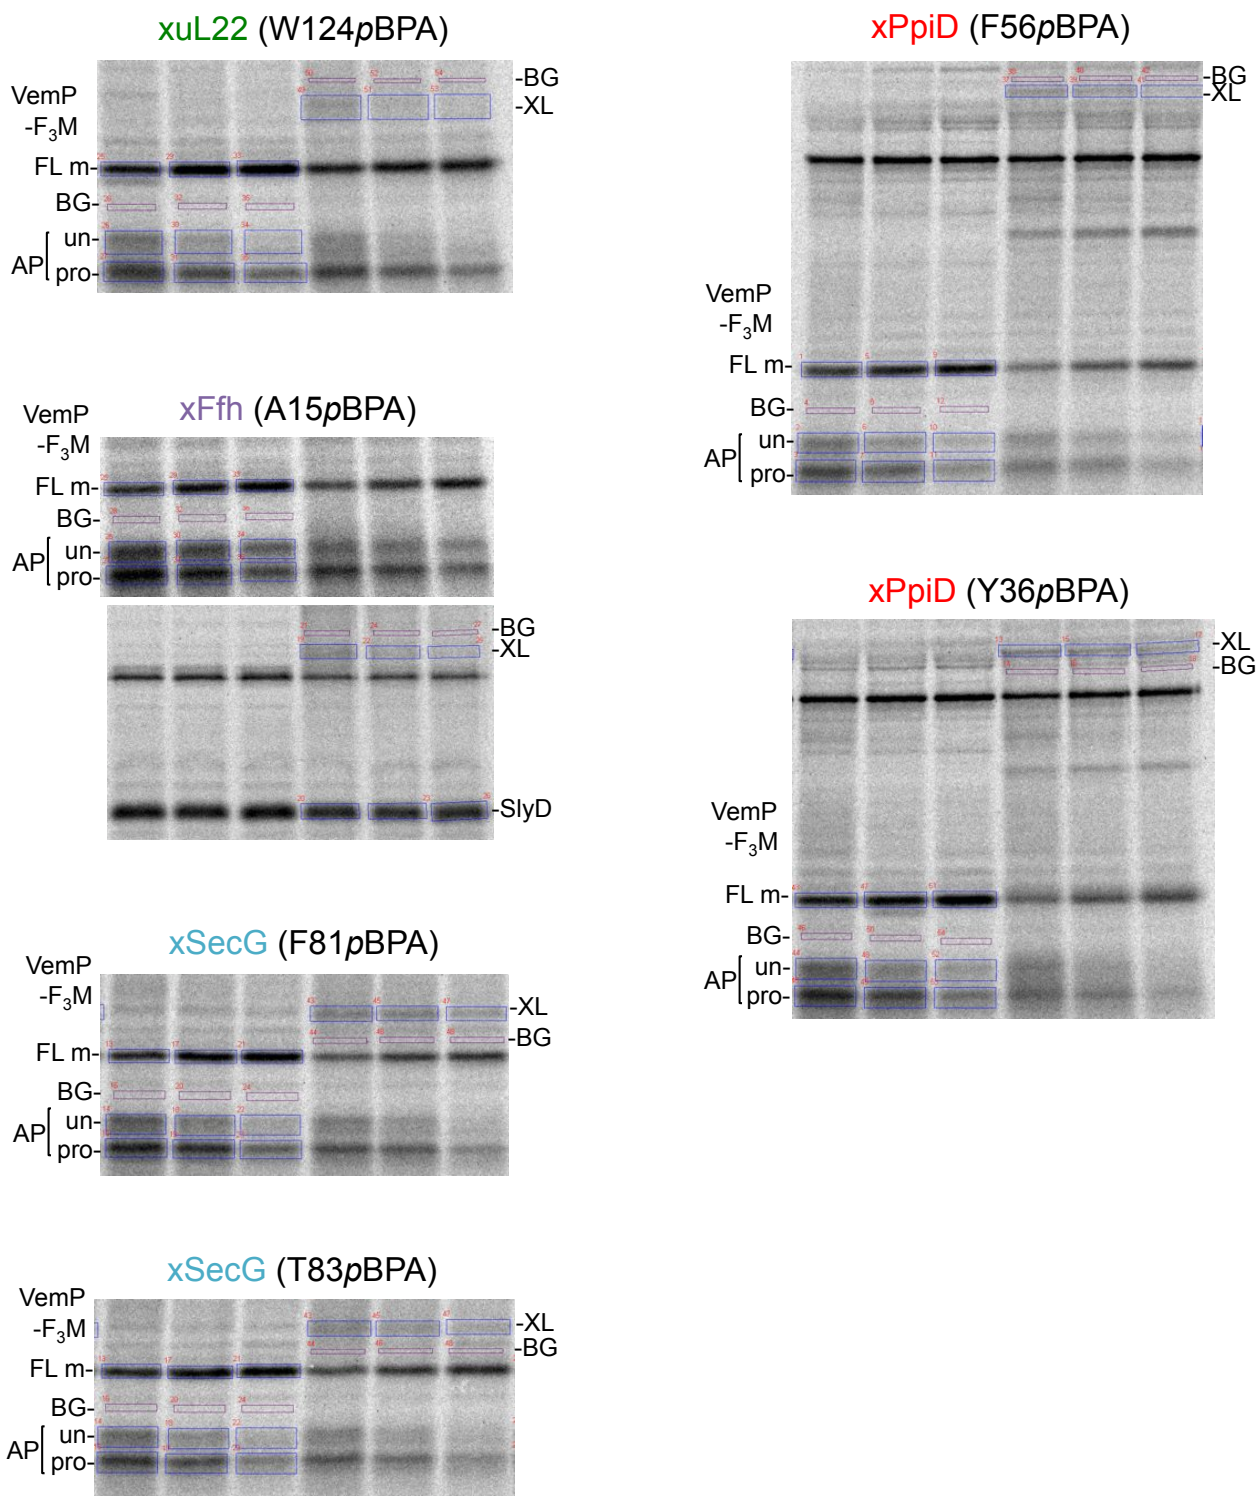

Supplement: supp [file elife-62623-supp-v1.zip]
